# Supplementary material for: Chiral ammonium betaine-catalyzed asymmetric Mannich-type reaction of oxindoles
Source: publisher site journal article supplement (doi:10.3762/bjoc.12.199), 2016-09-28
Supplement: Additional file 1 [file 1860-5397-12-199-S1.pdf]

## Supporting Information

for

# Chiral ammonium betaine-catalyzed asymmetric Mannich-type reaction of oxindoles

Masahiro Torii<sup>1</sup>, Kohsuke Kato<sup>1</sup>, Daisuke Uraguchi<sup>1</sup> and Takashi Ooi<sup>\*1,2</sup>

Address: <sup>1</sup>Institute of Transformative Bio-Molecules (WPI-ITbM) and Department of Applied Chemistry, Graduate School of Engineering, Nagoya University, Nagoya 464-8602, Japan and <sup>2</sup>CREST, Japan Science and Technology Agency (JST), Nagoya University, Nagoya 464-8602, Japan.

Email: Takashi Ooi\* - tooi@apchem.nagoya-u.ac.jp

\*Corresponding author

## Experimental procedures, characterization data, copies of NMR charts and HPLC traces, and X-ray data

**General Information:** Infrared spectra were recorded on a SHIMADZU IRAffinity-1 spectrometer. <sup>1</sup>H NMR spectra were recorded on a JEOL JNM-ECS400 (400 MHz) spectrometer or a JEOL JNM-ECA600 (600 MHz) spectrometer. Chemical shifts are reported in ppm from the solvent resonance ((CD<sub>3</sub>)<sub>2</sub>SO: 2.50 ppm, CD<sub>3</sub>CN: 1.94 ppm) or tetramethylsilane (0.00 ppm; CDCl<sub>3</sub>, CD<sub>3</sub>OD) resonance as the internal standard. Data are reported as follows: chemical shift, integration, multiplicity (s = singlet, d = doublet, t = triplet, m = multiplet, br = broad, brd = broad-doublet), and coupling constants (Hz). <sup>13</sup>C NMR spectra were recorded on a JEOL JNM-ECS400 (100 MHz) spectrometer or a JEOL JNM-ECA600 (151 MHz) spectrometer with complete proton decoupling. Chemical shifts are reported in ppm from the solvent resonance (CDCl<sub>3</sub>: 77.16 ppm, CD<sub>3</sub>OD: 49.00 ppm, (CD<sub>3</sub>)<sub>2</sub>SO: 39.52 ppm, CD<sub>3</sub>CN: 1.32 ppm). <sup>19</sup>F NMR spectra were recorded on a JEOL JNM-ECS400 (373 MHz) spectrometer with complete proton decoupling. Chemical shifts are reported in ppm from benzotrifluoride (–64.0 ppm) resonance as the external standard. The high resolution mass spectra were conducted on Thermo Fisher Scientific Exactive (ESI). Analytical thin layer chromatography (TLC) was performed on Merck precoated TLC

plates (silica gel 60 F<sub>254</sub>, 0.25 mm). Flash column chromatography was performed on Silica gel 60N (spherical neutral, 40–50 µm; Kanto Chemical Co., Inc.) or Chromatorex NH-DM2035 silica gel (Fuji Silysia Chemical Ltd.). Enantiomeric excesses were determined by HPLC analysis using chiral columns [ $\phi$  4.6 mm  $\times$  250 mm, DAICEL CHIRALPAK AD-3 (AD-3), CHIRALPAK AZ-3 (AZ-3), CHIRALPAK IC-3 (IC-3), CHIRALPAK IE-3 (IE-3), CHIRALPAK IF-3 (IF-3), and CHIRALCEL OZ-3 (OZ-3)] with hexane (H), 2-propanol (IPA), and ethanol (EtOH) as eluent.

Toluene was supplied from Kanto Chemical Co., Inc. as “Dehydrated” and further purified by passing through neutral alumina under nitrogen atmosphere. Betaines<sup>1</sup>, oxindoles<sup>2</sup>, and *N*-Boc imines<sup>3</sup> were prepared by following literature procedure. Powdered 4 Å molecular sieves (MS 4 Å) was supplied by Sigma-Aldrich Co. Other simple chemicals were purchased and used as such.

---

<sup>1</sup> (a) Uraguchi, D.; Koshimoto, K.; Ooi, T. *Chem. Commun.* **2010**, 46, 300. (b) Oyaizu, K.; Uraguchi, D.; Ooi, T. *Chem. Commun.* **2015**, 51, 4437.

<sup>2</sup> (a) Hamashima, Y.; Suzuki, T.; Takano, H.; Shimura, Y.; Sodeoka, M. *J. Am. Chem. Soc.* **2005**, 127, 10164. (b) Duan, S.-W.; An, J.; Chen, J.-R.; Xiao, W.-J. *Org. Lett.* **2011**, 13, 2290.

<sup>3</sup> (a) Wenzel, A. G.; Jacobsen, E. N. *J. Am. Chem. Soc.* **2002**, 124, 12964. (b) Song, J.; Wang, Y.; Deng, L. *J. Am. Chem. Soc.* **2006**, 128, 6048.

## Experimental section:

### Characterization of betaine precursor **1c**·HCl and betaine **1c**:

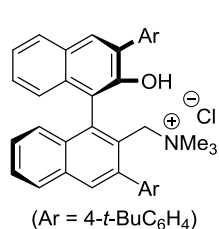

**1c**·HCl:  $^1\text{H}$  NMR (600 MHz,  $(\text{CD}_3)_2\text{SO}$ , 80 °C)  $\delta$  8.73 (1H, s), 8.12 (2H, t,  $J$  = 3.9 Hz), 8.08 (1H, s), 8.02 (1H, d,  $J$  = 7.8 Hz), 7.66-7.63 (5H, m), 7.58 (2H, d,  $J$  = 7.8 Hz), 7.53 (2H, d,  $J$  = 7.8 Hz), 7.43 (1H, t,  $J$  = 7.8 Hz), 7.40 (1H, t,  $J$  = 7.8 Hz), 7.34 (1H, t,  $J$  = 7.8 Hz), 7.27 (1H, d,  $J$  = 7.8 Hz), 6.91 (1H, d,  $J$  = 7.8 Hz), 4.90 (1H, br), 4.85 (1H, br), 2.52 (9H, s), 1.40 (9H, s), 1.38 (9H, s);  $^{13}\text{C}$  NMR (151 MHz,  $(\text{CD}_3)_2\text{SO}$ , 80 °C)  $\delta$  150.4, 149.7, 140.8, 137.9, 134.7, 133.8, 132.3, 131.5, 130.9, 130.8, 129.3, 128.8, 128.3, 128.2, 127.9, 127.6, 126.9, 126.8, 126.5, 125.4, 124.6, 123.4, 117.7, 64.4, 53.6, 34.0, 33.9, 30.7<sub>7</sub>, 30.7<sub>3</sub>, five carbon atoms were not found probably due to broadening or overlapping; IR (film) 3439, 2961, 1717, 1622, 1474, 1364, 1267, 1148, 1067, 1026, 839, 752  $\text{cm}^{-1}$ ; HRMS (ESI) Calcd for  $\text{C}_{44}\text{H}_{48}\text{NO}^+$  ( $[\text{M}-\text{Cl}]^+$ ) 606.3730, Found 606.3718.

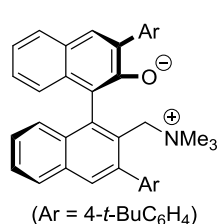

**1c**:  $^1\text{H}$  NMR (600 MHz,  $\text{CD}_3\text{OD}$ )  $\delta$  7.97 (2H, br), 7.89 (1H, br), 7.83 (1H, br), 7.73 (1H, br), 7.62 (3H, br), 7.56 (3H, br), 7.47 (3H, d,  $J$  = 7.8 Hz), 7.38-7.20 (2H, br), 7.04 (1H, s), 6.79-6.69 (1H, br), 5.12 (1H, dd,  $J$  = 13.2, 29.4 Hz), 4.34 (1H, d,  $J$  = 13.2 Hz), 2.61 (5H, s), 2.23 (4H, s), 1.40 (9H, s), 1.36 (9H, s);  $^{13}\text{C}$  NMR analysis gave broad spectrum and it was not assignable; IR (film) 3402, 2961, 2361, 1609, 1485, 1423, 1393, 1269, 1152, 1024, 837, 752  $\text{cm}^{-1}$ ; HRMS (ESI) Calcd for  $\text{C}_{44}\text{H}_{48}\text{NO}^+$  ( $[\text{M}+\text{H}]^+$ ) 606.3730, Found 606.3725.

### Representative procedure for asymmetric Mannich-type reaction of oxindole **2a** to imine **3a** catalyzed by chiral ammonium betaine **1c**:

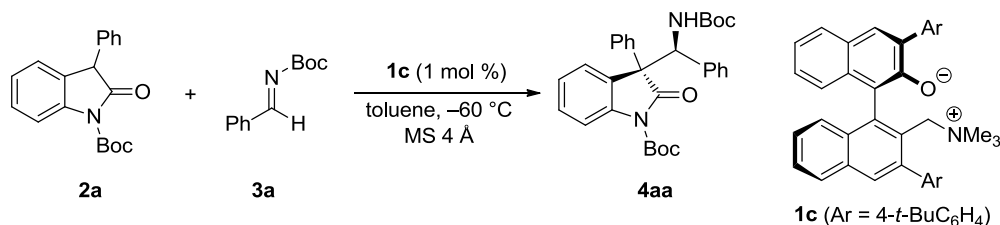

A magnetic stirrer bar and oven-dried 4 Å molecular sieves (MS 4 Å) (100.0 mg) were placed in an oven-dried test tube under argon (Ar) atmosphere. The test tube was heated with a heat gun under reduced pressure for 3 min and it was refilled with Ar. Then, chiral ammonium betaine **1c** (1.21 mg, 0.0020 mmol) and oxindole **2a** (61.9 mg, 0.2 mmol) were added to the test tube. After cooling to -60 °C, toluene (1.0 mL) and imine **3a** (49.3 mg, 0.24 mmol) were introduced and stirring was continued for 20 h. The reaction was quenched by the addition of a solution of trifluoroacetic acid in toluene (1.0 M, 2.0  $\mu\text{L}$ ) and hydrochloric acid (1.0 M, 2.0 mL). The aqueous phase was extracted with ethyl acetate (EA) twice. The combined organic phases were washed with brine, dried over  $\text{Na}_2\text{SO}_4$ , and filtered. All volatiles were removed by evaporation to afford the crude residue, which was analyzed by  $^1\text{H}$  NMR (600 MHz) to determine the diastereomeric ratio (dr = >20:1). Purification of the residue by column chromatography on Silica gel 60N (H/EA = 10:1 to 5:1 as eluent) gave **4aa** as a mixture of isomers (113.8 mg, 92%). The enantiomeric ratio was determined by chiral stationary phase HPLC (97% ee). **4aa**: HPLC AD-3, H/IPA/EtOH = 48:1:1, flow rate = 0.3 mL/min,  $\lambda$  = 210 nm, 22.8 min (major isomer of major diastereomer), 25.7 min (minor diastereomer), 28.6 min (minor isomer of major diastereomer), 37.7 min (minor diastereomer);  $^1\text{H}$

NMR (600 MHz, CDCl<sub>3</sub>) major diastereomer  $\delta$  7.65 (1H, d,  $J$  = 7.8 Hz), 7.53 (2H, d,  $J$  = 7.8 Hz), 7.48 (1H, brd,  $J$  = 7.8 Hz), 7.39-7.28 (5H, m), 7.11 (1H, t,  $J$  = 7.8 Hz), 7.04 (2H, t,  $J$  = 7.8 Hz), 6.80 (2H, d,  $J$  = 7.8 Hz), 5.92 (1H, br), 5.13 (1H, br), 1.47 (9H, s), 1.30 (9H, s); <sup>13</sup>C NMR (151 MHz, CDCl<sub>3</sub>) major diastereomer  $\delta$  174.3, 154.9, 148.6, 141.0, 137.1, 136.3, 129.5, 128.8, 128.7, 128.1, 127.9, 127.8, 127.7, 127.4, 125.4, 124.4, 115.5, 84.2, 80.4, 62.5, 59.5, 28.3, 28.1; IR (film) 2978, 1761, 1732, 1695, 1607, 1481, 1368, 1346, 1302, 1287, 1250, 1152, 1059 cm<sup>-1</sup>; HRMS (ESI) Calcd for C<sub>31</sub>H<sub>34</sub>N<sub>2</sub>NaO<sub>5</sub><sup>+</sup> ([M+Na]<sup>+</sup>) 537.2360, Found 537.2359.

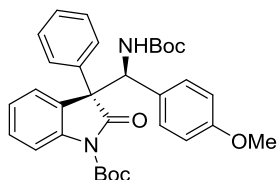

**4ab:** HPLC IE-3, H/EtOH = 19:1, flow rate = 0.5 mL/min,  $\lambda$  = 210 nm, 25.9 min (minor diastereomer), 30.3 min (minor diastereomer), 44.9 min (minor isomer of major diastereomer), 51.3 min (major isomer of major diastereomer); <sup>1</sup>H NMR (600 MHz, CDCl<sub>3</sub>) major diastereomer  $\delta$  7.68 (1H, d,  $J$  = 7.8 Hz), 7.52 (2H, d,  $J$  = 7.8 Hz), 7.47

(1H, brd,  $J$  = 7.8 Hz), 7.38 (1H, t,  $J$  = 7.8 Hz), 7.34 (2H, t,  $J$  = 7.8 Hz), 7.32-7.27 (2H, m), 6.71 (2H, d,  $J$  = 8.7 Hz), 6.57 (2H, d,  $J$  = 8.7 Hz), 5.87 (1H, br), 5.10 (1H, brd,  $J$  = 6.0 Hz), 3.68 (3H, s), 1.48 (9H, s), 1.30 (9H, s); <sup>13</sup>C NMR (151 MHz, CDCl<sub>3</sub>) major diastereomer  $\delta$  174.4, 159.1, 154.8, 148.6, 141.0, 136.3, 129.4, 129.2, 128.9, 128.7, 128.6, 128.1, 127.5, 125.4, 124.4, 115.6, 113.0, 84.1, 80.2, 62.5, 58.9, 55.2, 28.3, 28.0; IR (film) 2980, 1761, 1732, 1697, 1611, 1514, 1368, 1346, 1304, 1288, 1252, 1153, 1034 cm<sup>-1</sup>; HRMS (ESI) Calcd for C<sub>32</sub>H<sub>36</sub>N<sub>2</sub>NaO<sub>6</sub><sup>+</sup> ([M+Na]<sup>+</sup>) 567.2466, Found 567.2454.

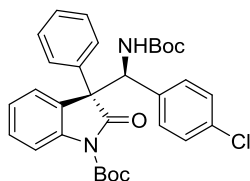

**4ac:** HPLC IF-3, H/EtOH = 97:3, flow rate = 0.3 mL/min,  $\lambda$  = 210 nm, 23.1 min (minor diastereomer), 26.3 min (minor diastereomer), 28.2 min (minor isomer of major diastereomer), 32.4 min (major isomer of major diastereomer); <sup>1</sup>H NMR (600 MHz, CDCl<sub>3</sub>) major diastereomer  $\delta$  7.67 (1H, d,  $J$  = 7.8 Hz), 7.49 (2H, d,  $J$  = 7.8 Hz), 7.47 (1H,

brd,  $J$  = 7.8 Hz), 7.39 (1H, t,  $J$  = 7.8 Hz), 7.35 (2H, t,  $J$  = 7.8 Hz), 7.32-7.29 (2H, m), 7.02 (2H, d,  $J$  = 7.8 Hz), 6.77 (2H, d,  $J$  = 7.8 Hz), 5.87 (1H, br), 5.17 (1H, br), 1.49 (9H, s), 1.30 (9H, s); <sup>13</sup>C NMR (151 MHz, CDCl<sub>3</sub>) major diastereomer  $\delta$  174.2, 154.8, 148.4, 140.9, 135.9, 135.8, 133.7, 129.6, 129.2, 128.7, 128.6, 128.3, 127.8, 126.9, 125.4, 124.5, 115.6, 84.4, 80.6, 62.2, 59.0, 28.3, 28.0; IR (film) 2980, 1759, 1732, 1695, 1607, 1491, 1368, 1346, 1304, 1287, 1250, 1150, 1098 cm<sup>-1</sup>; HRMS (ESI) Calcd for C<sub>31</sub>H<sub>33</sub><sup>35</sup>ClN<sub>2</sub>NaO<sub>5</sub><sup>+</sup> [(M+Na)<sup>+</sup>] 571.1970, Found 571.1970.

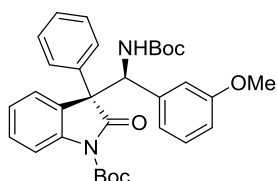

**4ad:** HPLC OZ-3, H/EtOH = 9:1, flow rate = 0.5 mL/min,  $\lambda$  = 210 nm, 8.3 min (minor diastereomer), 9.4 min (minor diastereomer), 10.2 min (minor isomer of major diastereomer), 12.2 min (major isomer of major diastereomer); <sup>1</sup>H NMR (600 MHz, CDCl<sub>3</sub>) major diastereomer  $\delta$  7.69 (1H, d,  $J$  = 8.4 Hz), 7.53 (2H, d,  $J$  = 8.4 Hz), 7.47

(1H, brd,  $J$  = 8.4 Hz), 7.38 (1H, t,  $J$  = 8.4 Hz), 7.35 (2H, t,  $J$  = 8.4 Hz), 7.33-7.28 (2H, m), 6.95 (1H, t,  $J$  = 8.1 Hz), 6.66 (1H, dd,  $J$  = 2.1, 8.1 Hz), 6.40 (1H, d,  $J$  = 8.1 Hz), 6.33 (1H, s), 5.90 (1H, br), 5.11 (1H, br), 3.57 (3H, s), 1.48 (9H, s), 1.31 (9H, s); <sup>13</sup>C NMR (151 MHz, CDCl<sub>3</sub>) major diastereomer  $\delta$  174.2, 158.9, 154.8, 148.6, 141.1, 138.5, 136.2, 129.4, 128.7, 128.6, 128.1, 128.0, 127.3, 125.4, 124.3, 120.2, 115.6, 114.4, 112.5, 84.2, 80.3, 62.4, 59.5, 55.1, 28.3, 28.0; IR (film) 2978, 1761, 1732, 1695, 1603, 1491, 1368, 1346, 1304, 1288, 1252, 1152, 1053 cm<sup>-1</sup>; HRMS (ESI) Calcd for C<sub>32</sub>H<sub>36</sub>N<sub>2</sub>NaO<sub>6</sub><sup>+</sup> ([M+Na]<sup>+</sup>) 567.2466, Found 567.2452.

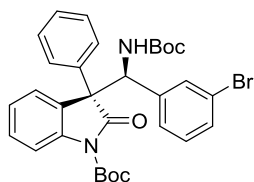

**4ae:** HPLC OZ-3, H/IPA = 99:1, flow rate = 0.5 mL/min,  $\lambda$  = 210 nm, 12.2 min (minor diastereomer), 16.1 min (minor diastereomer), 22.8 min (minor isomer of major diastereomer), 41.2 min (major isomer of major diastereomer);  $^1\text{H}$  NMR (600 MHz,  $\text{CDCl}_3$ ) major diastereomer  $\delta$  7.70 (1H, d,  $J$  = 7.8 Hz), 7.50 (2H, d,  $J$  = 7.8 Hz), 7.46 (1H, brd,  $J$  = 7.8 Hz), 7.40 (1H, t,  $J$  = 7.8 Hz), 7.36 (2H, t,  $J$  = 7.8 Hz), 7.34-7.30 (2H, m), 7.24 (1H, d,  $J$  = 7.8 Hz), 6.98 (1H, s), 6.91 (1H, t,  $J$  = 7.8 Hz), 6.75 (1H, d,  $J$  = 7.8 Hz), 5.85 (1H, br), 5.14 (1H, br), 1.51 (9H, s), 1.31 (9H, s);  $^{13}\text{C}$  NMR (151 MHz,  $\text{CDCl}_3$ ) major diastereomer  $\delta$  174.0, 154.8, 148.5, 140.8, 139.5, 135.8, 131.0, 130.9, 129.7, 129.1, 128.8, 128.6, 128.3, 126.8, 126.4, 125.3, 124.5, 121.7, 115.6, 84.5, 80.6, 62.2, 59.1, 28.3, 28.0; IR (film) 2978, 1761, 1734, 1697, 1607, 1570, 1479, 1368, 1346, 1302, 1288, 1252, 1151, 1059  $\text{cm}^{-1}$ ; HRMS (ESI) Calcd for  $\text{C}_{31}\text{H}_{33}^{79}\text{BrN}_2\text{NaO}_5^+$  ( $[\text{M}+\text{Na}]^+$ ) 615.1465, Found 615.1451.

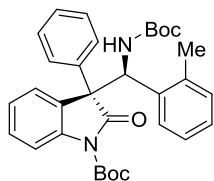

**4af:** HPLC IE-3, H/IPA = 23:2, flow rate = 0.5 mL/min,  $\lambda$  = 210 nm, 17.6 min (minor diastereomer), 20.7 min (minor isomer of major diastereomer), 22.6 min (major isomer of major diastereomer), 29.2 min (minor diastereomer);  $^1\text{H}$  NMR (600 MHz,  $\text{CDCl}_3$ ) major diastereomer  $\delta$  7.77 (1H, d,  $J$  = 7.8 Hz), 7.58 (2H, br), 7.50 (1H, br), 7.45 (1H, t,  $J$  = 7.8 Hz), 7.37-7.27 (4H, m), 7.07 (1H, d,  $J$  = 7.8 Hz), 7.02 (1H, t,  $J$  = 7.8 Hz), 6.72 (1H, t,  $J$  = 7.8 Hz), 6.35 (1H, br), 5.98 (1H, d,  $J$  = 7.8 Hz), 5.14 (1H, brd,  $J$  = 9.6 Hz), 2.57 (3H, s), 1.41 (9H, s), 1.32 (9H, s);  $^{13}\text{C}$  NMR (151 MHz,  $\text{CDCl}_3$ ) major diastereomer  $\delta$  173.9, 154.7, 148.6, 141.4, 136.9, 136.7, 136.2, 130.5, 129.6, 128.7, 128.5, 127.9, 127.8, 126.1, 125.7, 125.3, 124.5, 115.5, 83.8, 80.2, 61.8, 53.3, 28.3, 27.9, 20.2, one carbon atom was not found probably due to overlapping; IR (film) 2980, 1763, 1732, 1697, 1607, 1479, 1368, 1348, 1304, 1288, 1252, 1152, 1057  $\text{cm}^{-1}$ ; HRMS (ESI) Calcd for  $\text{C}_{32}\text{H}_{36}\text{N}_2\text{NaO}_5^+$  ( $[\text{M}+\text{Na}]^+$ ) 551.2516, Found 551.2506.

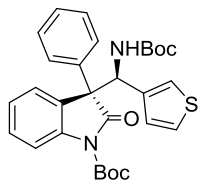

**4ag:** HPLC IC-3, H/EtOH = 49:1, flow rate = 0.3 mL/min,  $\lambda$  = 210 nm, 23.2 min (minor diastereomer), 25.3 min (minor diastereomer), 32.9 min (minor isomer of major diastereomer), 36.8 min (major isomer of major diastereomer);  $^1\text{H}$  NMR (600 MHz,  $\text{CDCl}_3$ ) major diastereomer  $\delta$  7.73 (1H, d,  $J$  = 7.8 Hz), 7.53 (2H, d,  $J$  = 7.8 Hz), 7.49 (1H, br), 7.39 (1H, t,  $J$  = 7.8 Hz), 7.34 (2H, t,  $J$  = 7.8 Hz), 7.29 (2H, t,  $J$  = 7.8 Hz), 6.96 (1H, dd,  $J$  = 2.6, 4.8 Hz), 6.81 (1H, d,  $J$  = 2.6 Hz), 6.36 (1H, d,  $J$  = 4.8 Hz), 6.06 (1H, br), 5.10 (1H, br), 1.51 (9H, s), 1.31 (9H, s);  $^{13}\text{C}$  NMR (151 MHz,  $\text{CDCl}_3$ ) major diastereomer  $\delta$  174.4, 154.8, 148.7, 141.0, 138.3, 136.0, 129.4, 128.6, 128.5, 128.1, 127.6, 126.4, 125.3, 124.8, 124.4, 123.3, 115.5, 84.3, 80.4, 62.2, 55.8, 28.3, 28.1; IR (film) 2978, 2916, 1761, 1732, 1695, 1607, 1481, 1368, 1348, 1302, 1288, 1252, 1152, 1057  $\text{cm}^{-1}$ ; HRMS (ESI) Calcd for  $\text{C}_{29}\text{H}_{32}\text{N}_2\text{NaO}_5\text{S}^+$  ( $[\text{M}+\text{Na}]^+$ ) 543.1924, Found 543.1922.

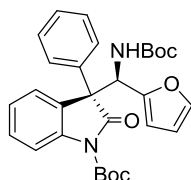

**4ah:** HPLC AD-3, H/IPA = 19:1, flow rate = 0.5 mL/min,  $\lambda$  = 210 nm, 16.1 min (major isomer of major diastereomer), 21.3 min (minor isomer of major diastereomer), 27.6 min (minor diastereomer), 49.2 min (minor diastereomer);  $^1\text{H}$  NMR (600 MHz,  $\text{CDCl}_3$ ) major diastereomer  $\delta$  7.80 (1H, d,  $J$  = 8.4 Hz), 7.51 (2H, brd,  $J$  = 7.2 Hz), 7.45 (1H, br), 7.37 (1H, dt,  $J$  = 1.5, 8.0 Hz), 7.31 (2H, t,  $J$  = 7.2 Hz), 7.30-7.24 (2H, m), 7.02 (1H, s), 6.10 (1H, dd,  $J$  = 1.8, 3.0 Hz), 6.10 (1H, br), 5.94 (1H, br), 5.16 (1H, brd,  $J$  = 10.2 Hz), 1.56 (9H, s), 1.32 (9H, s);  $^{13}\text{C}$  NMR (151 MHz,  $\text{CDCl}_3$ ) major diastereomer  $\delta$  174.2, 154.7, 150.8, 149.0, 142.0, 140.5, 135.8, 129.2, 128.5, 128.4, 128.0, 127.3, 125.4, 124.3, 115.4, 110.1, 107.6, 84.3, 80.3, 61.6, 54.2, 28.2, 28.1; IR (film) 2980, 1763, 1730, 1697, 1607, 1481, 1368, 1346,

1302, 1287, 1252, 1150, 1061  $\text{cm}^{-1}$ ; HRMS (ESI) Calcd for  $\text{C}_{29}\text{H}_{32}\text{N}_2\text{NaO}_6^+$  ( $[\text{M}+\text{Na}]^+$ ) 527.2153, Found 527.2144.

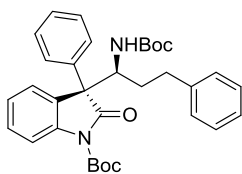

**4ai:** Purification by column chromatography was performed on Chromatorex NH-DM2035 silica gel (H/EA = 50:1 to 10:1 as eluent). HPLC AD-3, H/IPA = 19:1, flow rate = 0.5 mL/min,  $\lambda$  = 210 nm, 11.3 min (minor diastereomer), 14.1 min (minor isomer of major diastereomer), 16.2 min (major isomer of major diastereomer), 26.6 min (minor diastereomer);  $^1\text{H}$  NMR (600 MHz,  $\text{CD}_3\text{CN}$ ) major diastereomer  $\delta$  7.84 (1H, d,  $J$  = 7.8 Hz), 7.41-7.38 (2H, m), 7.29-7.23 (8H, m), 7.16 (1H, t,  $J$  = 7.8 Hz), 7.11 (2H, d,  $J$  = 7.8 Hz), 5.34 (1H, d,  $J$  = 10.8 Hz), 4.81 (1H, t,  $J$  = 10.8 Hz), 2.66-2.62 (1H, m), 2.54-2.49 (1H, m), 1.57 (11H, m), 1.29 (9H, s);  $^{13}\text{C}$  NMR (151 MHz,  $\text{CD}_3\text{CN}$ ) major diastereomer  $\delta$  176.1, 156.9, 149.8, 142.5, 140.9, 139.1, 129.7, 129.5, 129.3<sub>2</sub>, 129.2<sub>8</sub>, 128.7, 128.6, 126.9, 126.7, 125.3, 115.8, 85.2, 79.6, 62.6, 56.3, 34.6, 33.1, 28.5, 28.3, one carbon atom was not found probably due to overlapping; IR (film) 2978, 1759, 1732, 1694, 1605, 1497, 1479, 1366, 1348, 1304, 1287, 1248, 1148, 1057, 908  $\text{cm}^{-1}$ ; HRMS (ESI) Calcd for  $\text{C}_{33}\text{H}_{38}\text{N}_2\text{NaO}_5^+$  ( $[\text{M}+\text{Na}]^+$ ) 565.2673, Found 565.2668.

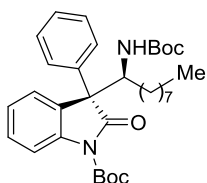

**4aj:** Purification by column chromatography was performed on Chromatorex NH-DM2035 silica gel (H/EA = 50:1 to 10:1 as eluent). HPLC AZ-3, H/IPA = 97:3, flow rate = 0.5 mL/min,  $\lambda$  = 210 nm, 11.3 min (minor diastereomer), 12.4 min (major isomer of major diastereomer), 14.5 min (minor isomer of major diastereomer), 27.2 min (minor diastereomer);  $^1\text{H}$  NMR (600 MHz,  $\text{CD}_3\text{CN}$ ) major diastereomer  $\delta$  7.88 (1H, d,  $J$  = 7.8 Hz), 7.42 (2H, t,  $J$  = 7.8 Hz), 7.36 (2H, d,  $J$  = 7.8 Hz), 7.30-7.25 (4H, m), 5.15 (1H, d,  $J$  = 10.8 Hz), 4.78 (1H, t,  $J$  = 10.8 Hz), 1.58 (9H, s), 1.26 (13H, m), 1.22 (10H, m), 0.86 (3H, t,  $J$  = 7.2 Hz);  $^{13}\text{C}$  NMR (151 MHz,  $\text{CD}_3\text{CN}$ ) major diastereomer  $\delta$  176.2, 157.0, 149.9, 141.0, 139.2, 129.7<sub>4</sub>, 129.6<sub>8</sub>, 129.3, 128.8, 128.6, 126.7, 125.3, 115.9, 85.2, 79.5, 62.6, 56.6, 32.6, 32.3, 30.1, 29.8, 29.6, 28.5, 28.3, 26.9, 23.3, 14.4; IR (film) 2928, 1759, 1732, 1694, 1607, 1464, 1366, 1348, 1302, 1287, 1248, 1148, 1057, 910  $\text{cm}^{-1}$ ; HRMS (ESI) Calcd for  $\text{C}_{33}\text{H}_{46}\text{N}_2\text{NaO}_5^+$  ( $[\text{M}+\text{Na}]^+$ ) 573.3299, Found 573.3305.

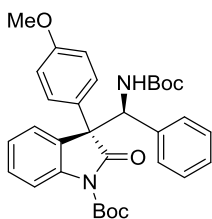

**4ba:** HPLC OZ-3, H/IPA/EtOH = 48:1:1, flow rate = 0.3 mL/min,  $\lambda$  = 210 nm, 17.7 min (minor diastereomer), 19.1 min (minor diastereomer), 23.7 min (major isomer of major diastereomer), 28.5 min (minor isomer of major diastereomer);  $^1\text{H}$  NMR (600 MHz,  $\text{CDCl}_3$ ) major diastereomer  $\delta$  7.64 (1H, d,  $J$  = 7.8 Hz), 7.47 (1H, br), 7.44 (2H, d,  $J$  = 7.8 Hz), 7.35 (1H, t,  $J$  = 7.8 Hz), 7.29 (1H, t,  $J$  = 7.8 Hz), 7.09 (1H, t,  $J$  = 7.8 Hz), 7.03 (2H, t,  $J$  = 7.8 Hz), 6.88 (2H, d,  $J$  = 7.8 Hz), 6.80 (2H, d,  $J$  = 7.8 Hz), 5.86 (1H, br), 5.19 (1H, d,  $J$  = 8.4 Hz), 3.78 (3H, s), 1.47 (9H, s), 1.30 (9H, s);  $^{13}\text{C}$  NMR (151 MHz,  $\text{CDCl}_3$ ) major diastereomer  $\delta$  174.6, 159.4, 154.9, 148.6, 140.8, 137.1, 129.9, 129.3, 128.1, 127.7<sub>1</sub>, 127.6<sub>7</sub>, 127.6, 125.9, 125.3, 124.3, 115.4, 114.0, 84.0, 80.2, 61.8, 59.4, 55.3, 28.2, 28.0; IR (film) 2978, 1761, 1732, 1697, 1607, 1512, 1368, 1346, 1304, 1288, 1252, 1152, 1034  $\text{cm}^{-1}$ ; HRMS (ESI) Calcd for  $\text{C}_{32}\text{H}_{36}\text{N}_2\text{NaO}_6^+$  ( $[\text{M}+\text{Na}]^+$ ) 567.2466, Found 567.2465.

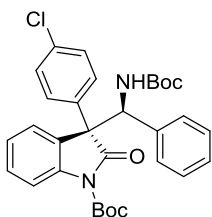

**4ca:** HPLC AD-3, H/IPA = 97:3, flow rate = 0.5 mL/min,  $\lambda$  = 210 nm, 19.4 min (major isomer of major diastereomer), 24.2 min (minor diastereomer), 26.0 min (minor isomer of major diastereomer), 31.1 min (minor diastereomer);  $^1\text{H}$  NMR (600 MHz,  $\text{CDCl}_3$ ) major diastereomer  $\delta$  7.65 (1H, d,  $J$  = 8.0 Hz), 7.50 (2H, d,  $J$  = 8.0 Hz), 7.47 (1H, br), 7.38 (1H, t,  $J$

= 8.0 Hz), 7.34-7.28 (3H, m), 7.11 (1H, t,  $J$  = 8.0 Hz), 7.04 (2H, t,  $J$  = 8.0 Hz), 6.78 (2H, d,  $J$  = 8.0 Hz), 5.89 (1H, br), 5.22 (1H, br), 1.47 (9H, s), 1.31 (9H, s);  $^{13}\text{C}$  NMR (151 MHz,  $\text{CDCl}_3$ ) major diastereomer  $\delta$  174.0, 154.8, 148.4, 140.9, 136.7, 134.8, 134.2, 130.2, 129.6, 128.6, 128.0, 127.7, 127.6, 126.8, 125.2, 124.5, 115.6, 84.3, 80.5, 62.1, 59.4, 28.2, 28.0; IR (film) 2926, 1763, 1734, 1697, 1607, 1493, 1368, 1346, 1304, 1287, 1252, 1152, 1098  $\text{cm}^{-1}$ ; HRMS (ESI) Calcd for  $\text{C}_{31}\text{H}_{33}^{35}\text{ClN}_2\text{NaO}_5^+$  ( $[\text{M}+\text{Na}]^+$ ) 571.1970, Found 571.1961.

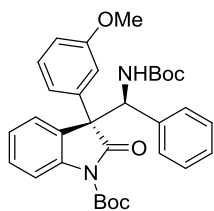

**4da:** HPLC OZ-3, H/EtOH = 97:3, flow rate = 0.5 mL/min,  $\lambda$  = 210 nm, 10.6 min (minor diastereomer), 12.6 min (minor isomer of major diastereomer), 16.5 min (minor diastereomer), 24.5 min (major isomer of major diastereomer);  $^1\text{H}$  NMR (600 MHz,  $\text{CDCl}_3$ ) major diastereomer  $\delta$  7.64 (1H, d,  $J$  = 8.4 Hz), 7.46 (1H, br), 7.36 (1H, t,  $J$  = 8.1 Hz), 7.29 (1H, t,  $J$  = 7.8 Hz), 7.26-7.23 (1H, m), 7.14 (1H, s), 7.10 (1H, t,  $J$  = 7.2 Hz), 7.03 (3H, t,  $J$  = 7.5 Hz), 6.85 (1H, d,  $J$  = 7.8 Hz), 6.80 (2H, d,  $J$  = 7.8 Hz), 5.92 (1H, br), 5.17 (1H, br), 3.80 (3H, s), 1.47 (9H, s), 1.31 (9H, s);  $^{13}\text{C}$  NMR (151 MHz,  $\text{CDCl}_3$ ) major diastereomer  $\delta$  174.1, 159.8, 154.9, 148.5, 140.9, 139.9, 138.9, 137.8, 137.0, 129.4, 127.8, 127.7, 127.6, 125.3, 124.4, 121.0, 115.4, 113.9, 113.2, 84.1, 80.3, 62.4, 58.8, 55.4, 28.3, 28.0; IR (film) 2978, 1759, 1732, 1695, 1603, 1493, 1368, 1344, 1302, 1288, 1252, 1150, 1059  $\text{cm}^{-1}$ ; HRMS (ESI) Calcd for  $\text{C}_{32}\text{H}_{36}\text{N}_2\text{NaO}_6^+$  ( $[\text{M}+\text{Na}]^+$ ) 567.2466, Found 567.2456.

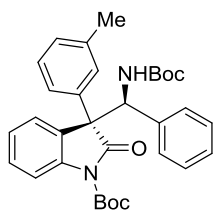

**4ea:** HPLC AD-3, H/IPA = 97:3, flow rate = 0.5 mL/min,  $\lambda$  = 210 nm, 13.7 min (major isomer of major diastereomer), 15.6 min (minor diastereomer), 18.2 min (minor isomer of major diastereomer), 28.7 min (minor diastereomer);  $^1\text{H}$  NMR (600 MHz,  $\text{CDCl}_3$ ) major diastereomer  $\delta$  7.65 (1H, d,  $J$  = 7.8 Hz), 7.44 (1H, br), 7.37-7.34 (2H, m), 7.29 (1H, t,  $J$  = 7.2 Hz), 7.23-7.20 (2H, m), 7.11 (1H, d,  $J$  = 6.6 Hz), 7.09 (1H, d,  $J$  = 7.8 Hz), 7.03 (2H, t,  $J$  = 7.5 Hz), 6.80 (2H, d,  $J$  = 7.2 Hz), 5.92 (1H, br), 5.18 (1H, brd,  $J$  = 9.0 Hz), 2.33 (3H, s), 1.47 (9H, s), 1.31 (9H, s);  $^{13}\text{C}$  NMR (151 MHz,  $\text{CDCl}_3$ ) major diastereomer  $\delta$  174.3, 154.9, 148.6, 140.9, 138.2, 137.1, 136.3, 129.3<sub>4</sub>, 129.3<sub>0</sub>, 128.9, 128.4, 127.7, 127.6, 126.3, 126.2, 125.7, 125.3, 124.4, 115.4, 84.0, 80.2, 62.4, 59.0, 28.2, 28.0, 21.7; IR (film) 2978, 1761, 1732, 1699, 1605, 1481, 1368, 1344, 1302, 1287, 1250, 1150, 1096, 1061, 910  $\text{cm}^{-1}$ ; HRMS (ESI) Calcd for  $\text{C}_{32}\text{H}_{36}\text{N}_2\text{NaO}_5^+$  ( $[\text{M}+\text{Na}]^+$ ) 551.2516, Found 551.2507.

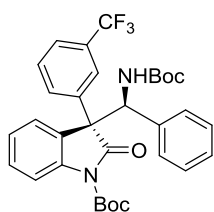

**4fa:** HPLC IE-3, H/IPA = 19:1, flow rate = 0.5 mL/min,  $\lambda$  = 210 nm, 15.2 min (minor diastereomer), 16.8 min (minor isomer of major diastereomer), 19.1 min (minor diastereomer), 22.7 min (major isomer of major diastereomer);  $^1\text{H}$  NMR (600 MHz,  $\text{CDCl}_3$ ) major diastereomer  $\delta$  7.80 (2H, br), 7.68 (1H, d,  $J$  = 7.8 Hz), 7.58 (1H, d,  $J$  = 7.8 Hz), 7.49 (2H, t,  $J$  = 7.8 Hz), 7.41 (1H, dt,  $J$  = 1.8, 7.8 Hz), 7.35 (1H, t,  $J$  = 7.8 Hz), 7.13 (1H, t,  $J$  = 7.8 Hz), 7.05 (2H, t,  $J$  = 7.8 Hz), 6.77 (2H, d,  $J$  = 7.8 Hz), 5.99 (1H, br), 5.19 (1H, brd,  $J$  = 10.2 Hz), 1.47 (9H, s), 1.30 (9H, s);  $^{13}\text{C}$  NMR (151 MHz,  $\text{CDCl}_3$ ) major diastereomer  $\delta$  173.8, 154.7, 148.4, 141.1, 137.5, 136.5, 132.5, 130.8 (q,  $J_{\text{F-C}}$  = 32.8 Hz), 129.9, 129.0, 128.1, 127.8, 127.7, 126.6, 125.5, 125.4, 125.0, 124.7, 124.2 (q,  $J_{\text{F-C}}$  = 27.2.8 Hz), 115.7, 84.4, 80.6, 62.5, 59.4, 28.2, 28.0;  $^{19}\text{F}$  NMR (373 MHz,  $\text{CDCl}_3$ )  $\delta$  -62.3; IR (film) 2980, 1761, 1734, 1697, 1607, 1481, 1369, 1346, 1329, 1287, 1252, 1152, 1128, 1080  $\text{cm}^{-1}$ ; HRMS (ESI) Calcd for  $\text{C}_{32}\text{H}_{33}\text{F}_3\text{N}_2\text{NaO}_5^+$  ( $[\text{M}+\text{Na}]^+$ ) 605.2234, Found 605.2220.

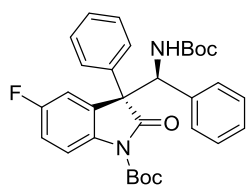

**4ga:** HPLC IE-3, H/IPA = 19:1, flow rate = 0.5 mL/min,  $\lambda$  = 210 nm, 18.5 min (minor diastereomer), 21.5 min (minor diastereomer), 28.1 min (minor isomer of major diastereomer), 29.8 min (major isomer of major diastereomer);  $^1\text{H}$  NMR (400 MHz,  $\text{CDCl}_3$ ) major diastereomer  $\delta$  7.65 (1H, dd,  $J_{\text{H-H}} = 4.4$  Hz,  $J_{\text{F-H}} = 9.2$  Hz), 7.52 (2H, d,  $J = 8.8$  Hz), 7.40-7.28 (3H, m), 7.27 (1H, br), 7.15-7.00 (4H, m), 6.86 (2H, d,  $J = 7.2$  Hz), 5.91 (1H, br), 5.24 (1H, br), 1.47 (9H, s), 1.29 (9H, s);  $^{13}\text{C}$  NMR (100 MHz,  $\text{CDCl}_3$ ) major diastereomer  $\delta$  173.9, 159.7 (d,  $J_{\text{F-C}} = 245.3$  Hz), 154.9, 148.5, 136.9 (d,  $J_{\text{F-C}} = 6.8$  Hz), 135.6, 129.0, 128.7, 128.6, 128.3, 127.9, 127.7<sub>3</sub>, 127.6<sub>6</sub>, 116.7 (d,  $J_{\text{F-C}} = 7.7$  Hz), 115.9 (d,  $J_{\text{F-C}} = 22.1$  Hz), 113.1 (d,  $J_{\text{F-C}} = 22.1$  Hz), 84.3, 80.5, 62.7, 59.8, 28.2, 28.0, one carbon atom was not found probably due to overlapping;  $^{19}\text{F}$  NMR (373 MHz,  $\text{CDCl}_3$ )  $\delta$  -117.0; IR (film) 2980, 1765, 1732, 1695, 1607, 1483, 1368, 1346, 1298, 1269, 1244, 1150, 1059  $\text{cm}^{-1}$ ; HRMS (ESI) Calcd for  $\text{C}_{31}\text{H}_{33}\text{FN}_2\text{NaO}_5^+$  ( $[\text{M}+\text{Na}]^+$ ) 555.2266, Found 555.2255.

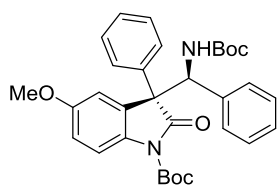

**4ha:** HPLC OZ-3, H/EtOH = 97:3, flow rate = 0.5 mL/min,  $\lambda$  = 210 nm, 11.2 min (minor diastereomer), 13.5 min (minor diastereomer), 20.2 min (minor isomer of major diastereomer), 28.2 min (major isomer of major diastereomer);  $^1\text{H}$  NMR (600 MHz,  $\text{CDCl}_3$ ) major diastereomer  $\delta$  7.59 (1H, d,  $J = 7.8$  Hz), 7.53 (2H, d,  $J = 7.8$  Hz), 7.35 (2H, t,  $J = 7.8$  Hz), 7.30 (1H, t,  $J = 7.8$  Hz), 7.12 (1H, t,  $J = 7.8$  Hz), 7.06 (2H, t,  $J = 7.8$  Hz), 7.03 (1H, s), 6.89 (1H, d,  $J = 7.8$  Hz), 6.84 (2H, d,  $J = 7.8$  Hz), 5.92 (1H, br), 5.17 (1H, brd,  $J = 7.8$  Hz), 3.88 (3H, s), 1.46 (9H, s), 1.30 (9H, s);  $^{13}\text{C}$  NMR (151 MHz,  $\text{CDCl}_3$ ) major diastereomer  $\delta$  174.2, 156.7, 154.8, 148.6, 137.1, 136.2, 134.5, 128.7, 128.6, 128.1, 127.8<sub>3</sub>, 127.7<sub>8</sub>, 127.6, 125.9, 116.3, 113.2, 112.4, 83.9, 80.3, 62.7, 59.1, 55.9, 28.3, 28.0; IR (film) 2978, 1759, 1728, 1694, 1599, 1487, 1368, 1300, 1279, 1246, 1152, 1036  $\text{cm}^{-1}$ ; HRMS (ESI) Calcd for  $\text{C}_{32}\text{H}_{36}\text{N}_2\text{NaO}_6^+$  ( $[\text{M}+\text{Na}]^+$ ) 567.2466, Found 567.2451.

**Crystallographic structure determination:** The single crystal, obtained by the procedure described below, was mounted on MicroMesh. Data of X-ray diffraction were collected at 123 K on a Rigaku FR-X with Pilatus 200K with fine-focus sealed tube Mo  $K\alpha$  radiation ( $\lambda = 0.71075$  Å). An absorption correction was made using Crystal Structure. The structure was solved by direct methods and Fourier syntheses, and refined by full-matrix least squares on  $F^2$  by using SHELXL-2014.<sup>4</sup> All non-hydrogen atoms were refined with anisotropic displacement parameters. A hydrogen atom bonded to a nitrogen atom was located from a difference synthesis and their coordinates and isotropic thermal parameters refined. The other hydrogen atoms were placed in calculated positions and isotropic thermal parameters refined.

**Recrystallization of 4ac:** Recrystallization of **4ac** was performed by using a  $\text{CHCl}_3/\text{Et}_2\text{O}$  solvent system at room temperature.

<sup>4</sup> Sheldrick, G. M. *Acta Cryst.* 2015, **C71**, 3.



**Table S1:** Crystal data and structure refinement for **4ac**.

|                                 |                                                                  |                           |
|---------------------------------|------------------------------------------------------------------|---------------------------|
| Empirical formula               | C <sub>31</sub> H <sub>33</sub> Cl N <sub>2</sub> O <sub>5</sub> |                           |
| Formula weight                  | 549.04                                                           |                           |
| Temperature                     | 123(2) K                                                         |                           |
| Wavelength                      | 0.71075 Å                                                        |                           |
| Crystal system                  | Monoclinic                                                       |                           |
| Space group                     | P21                                                              |                           |
| Unit cell dimensions            | a = 8.9878(10) Å                                                 | $\alpha = 90^\circ$       |
|                                 | b = 14.6983(18) Å                                                | $\beta = 90.983(3)^\circ$ |
|                                 | c = 10.8669(13) Å                                                | $\gamma = 90^\circ$       |
| Volume                          | 1435.4(3) Å <sup>3</sup>                                         |                           |
| Z                               | 2                                                                |                           |
| Density (calculated)            | 1.270 Mg/m <sup>3</sup>                                          |                           |
| Absorption coefficient          | 0.175 mm <sup>-1</sup>                                           |                           |
| F(000)                          | 580                                                              |                           |
| Crystal size                    | 0.30 x 0.20 x 0.10 mm <sup>3</sup>                               |                           |
| Theta range for data collection | 3.2 to 27.5°                                                     |                           |
| Index ranges                    | -10 ≤ h ≤ 10, -17 ≤ k ≤ 17, -23 ≤ l ≤ 11                         |                           |
| Reflections collected           | 9914                                                             |                           |
| Independent reflections         | 4860 [R <sub>int</sub> = 0.0128]                                 |                           |
| Completeness to theta = 27.48°  | 98.4 %                                                           |                           |
| Absorption correction           | Semi-empirical from equivalents                                  |                           |
| Max. and min. transmission      | 0.886 and 1.000                                                  |                           |
| Refinement method               | Full-matrix least-squares on $F^2$                               |                           |
| Data / restraints / parameters  | 4860 / 1 / 363                                                   |                           |
| Goodness-of-fit on $F^2$        | 1.080                                                            |                           |
| Final R indices [I > 2σ(I)]     | R <sub>1</sub> = 0.0241, wR <sub>2</sub> = 0.0626                |                           |
| R indices (all data)            | R <sub>1</sub> = 0.0244, wR <sub>2</sub> = 0.0628                |                           |
| Absolute structure parameter    | 0.003(11)                                                        |                           |
| Largest diff. peak and hole     | 0.237 and -0.295 e.Å <sup>-3</sup>                               |                           |

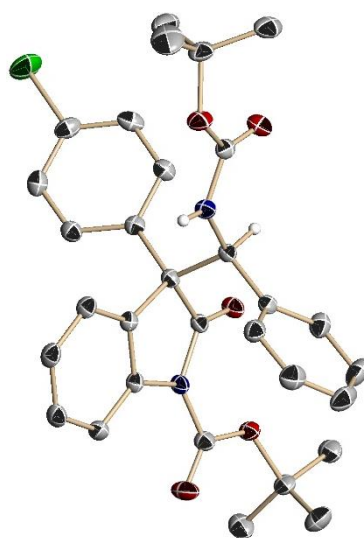**Figure S1:** Molecular structure of **4ac**. The thermal ellipsoids of non-hydrogen atoms are shown at the 50% probability level. Blue = nitrogen, green = chlorine, red = oxygen, black = carbon.

Copies of  $^1\text{H}$  and  $^{13}\text{C}$  NMR spectra:

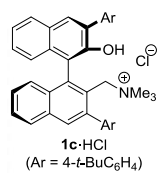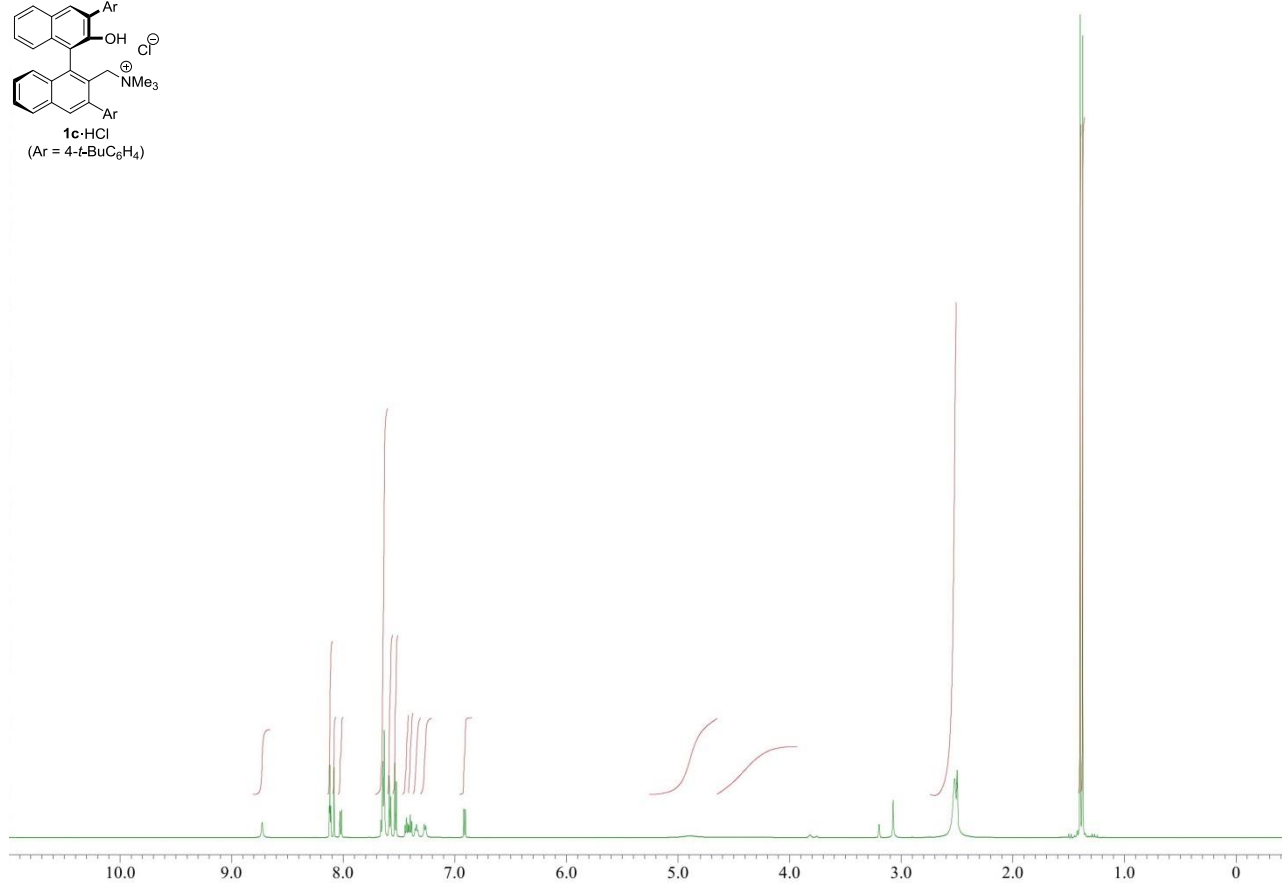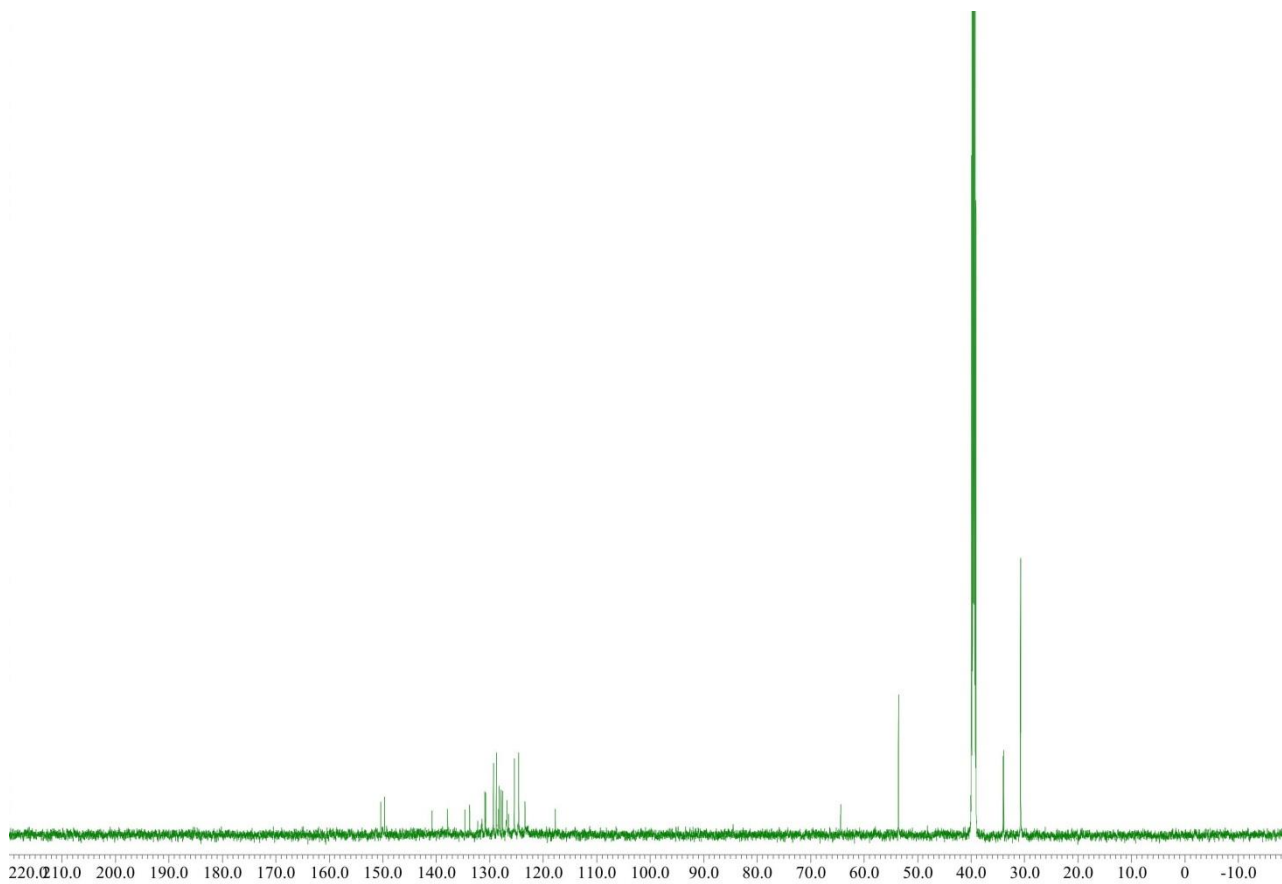

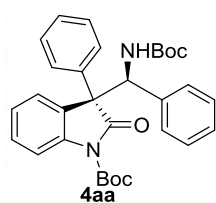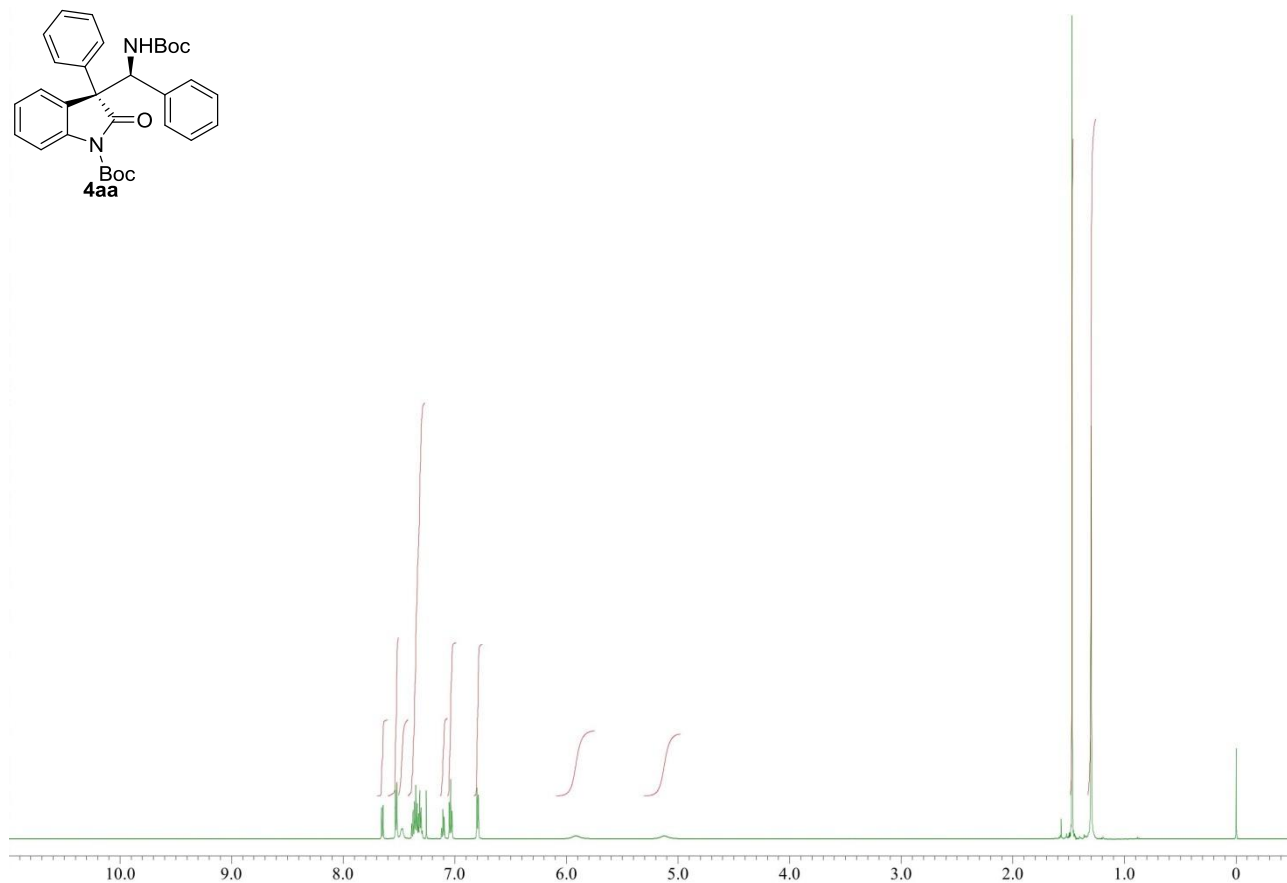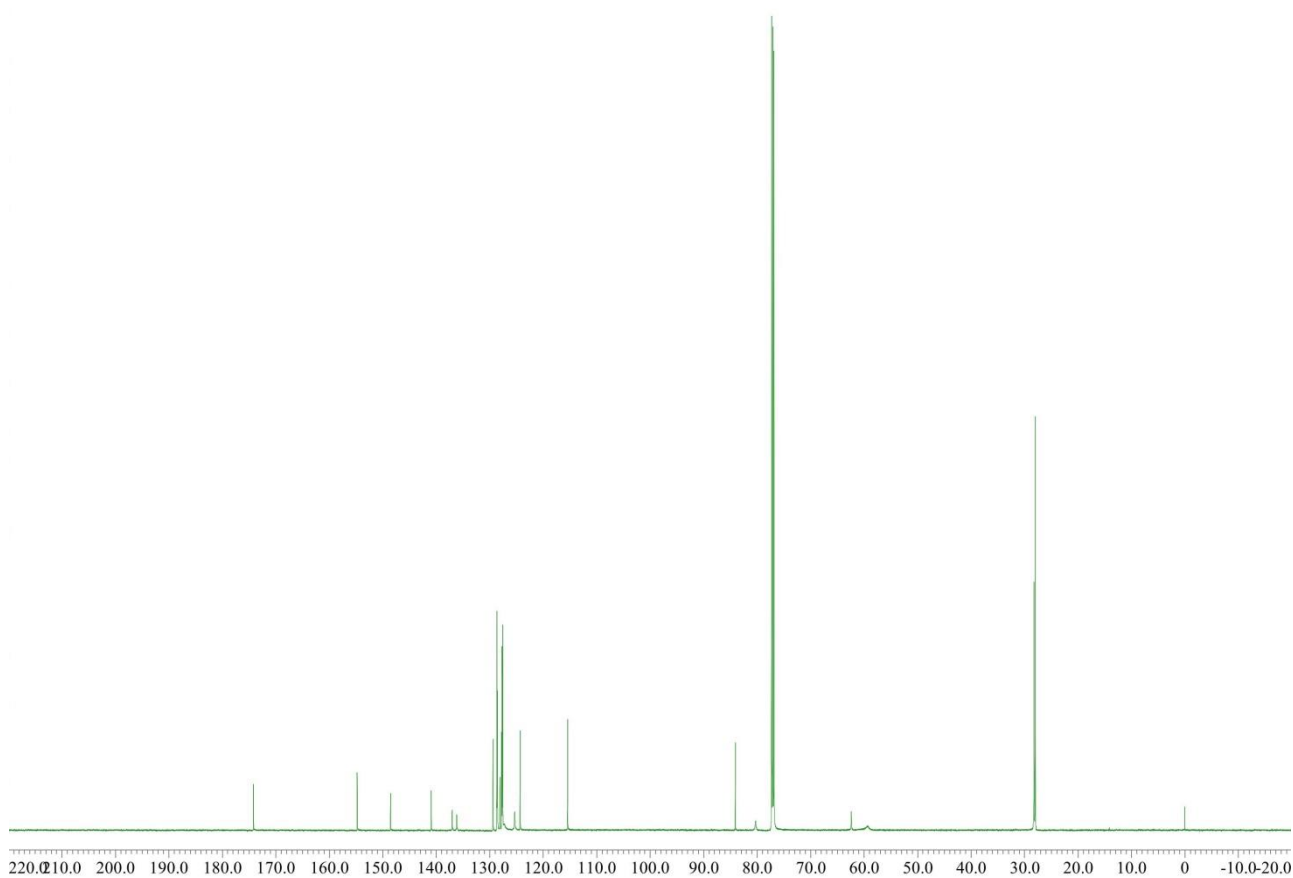

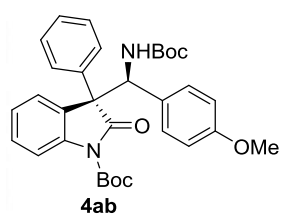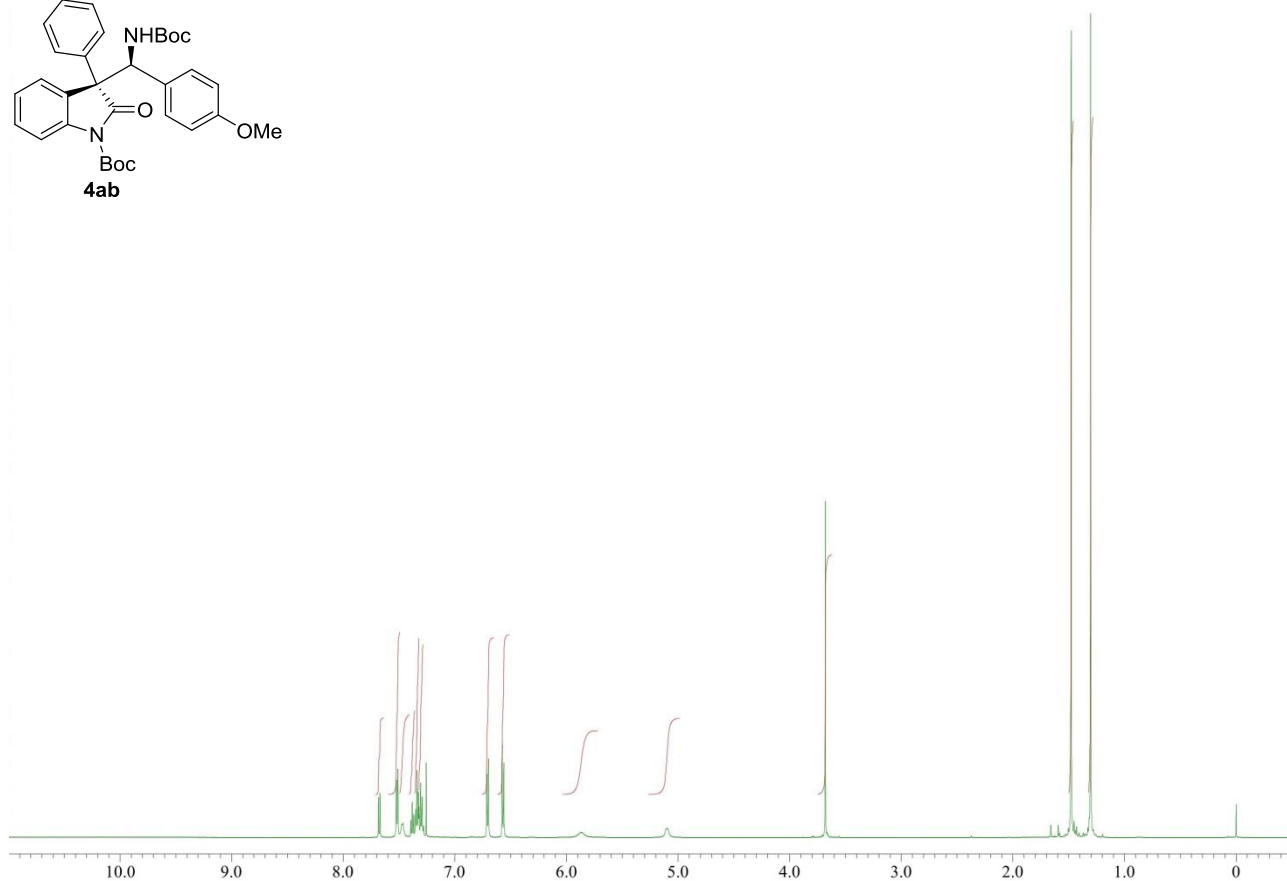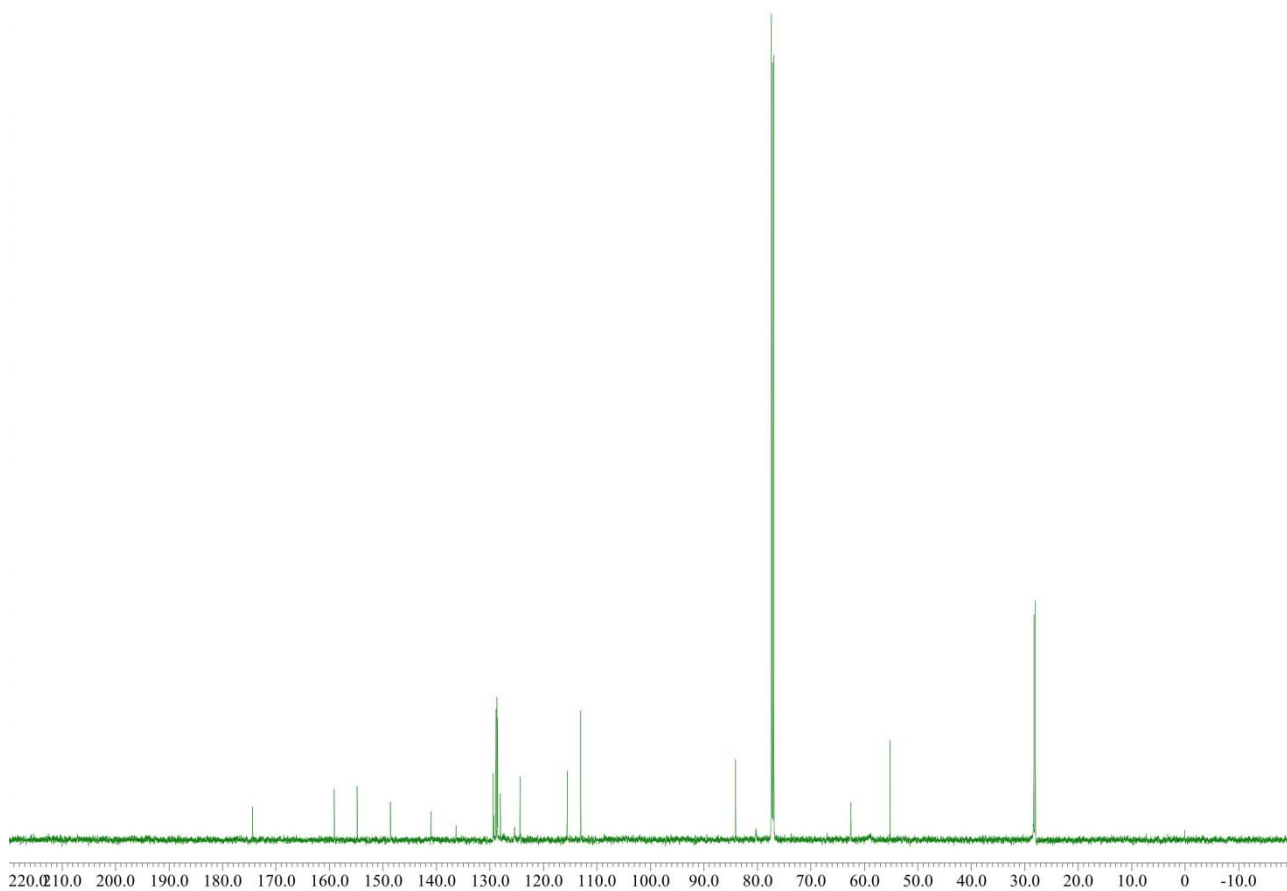

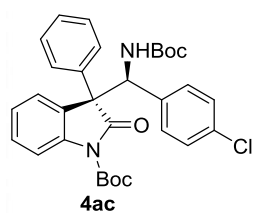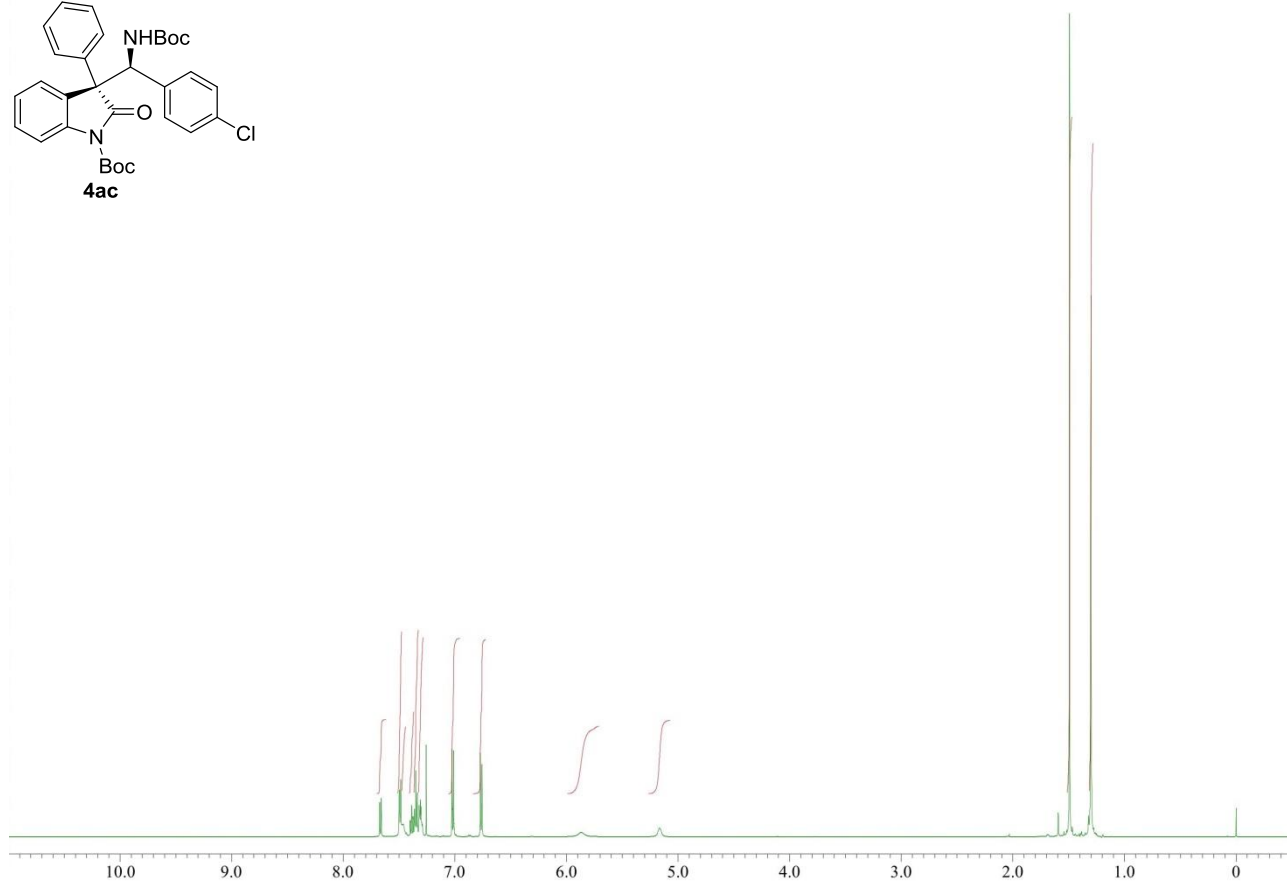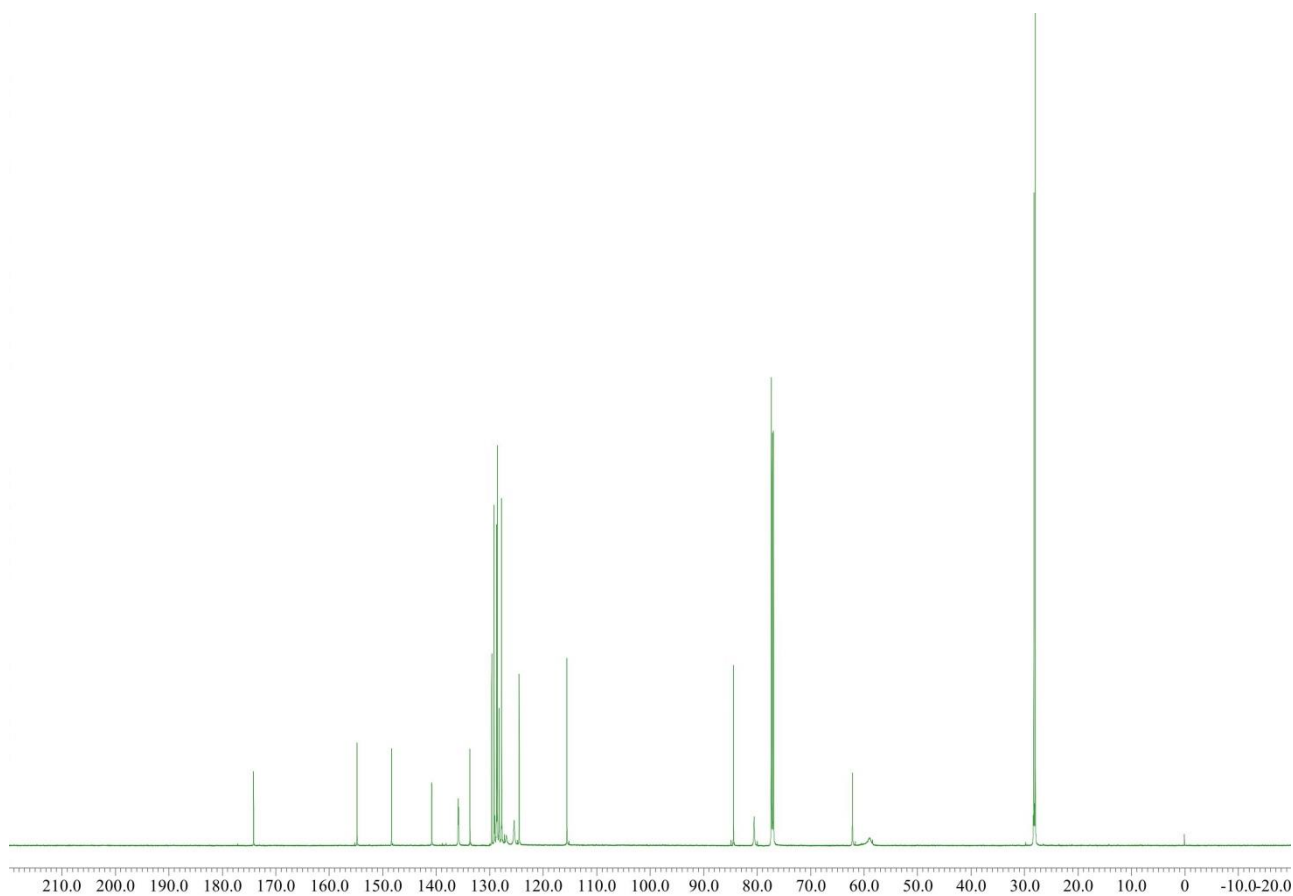

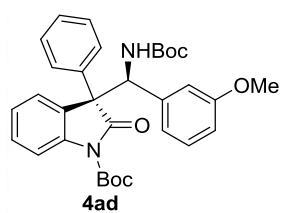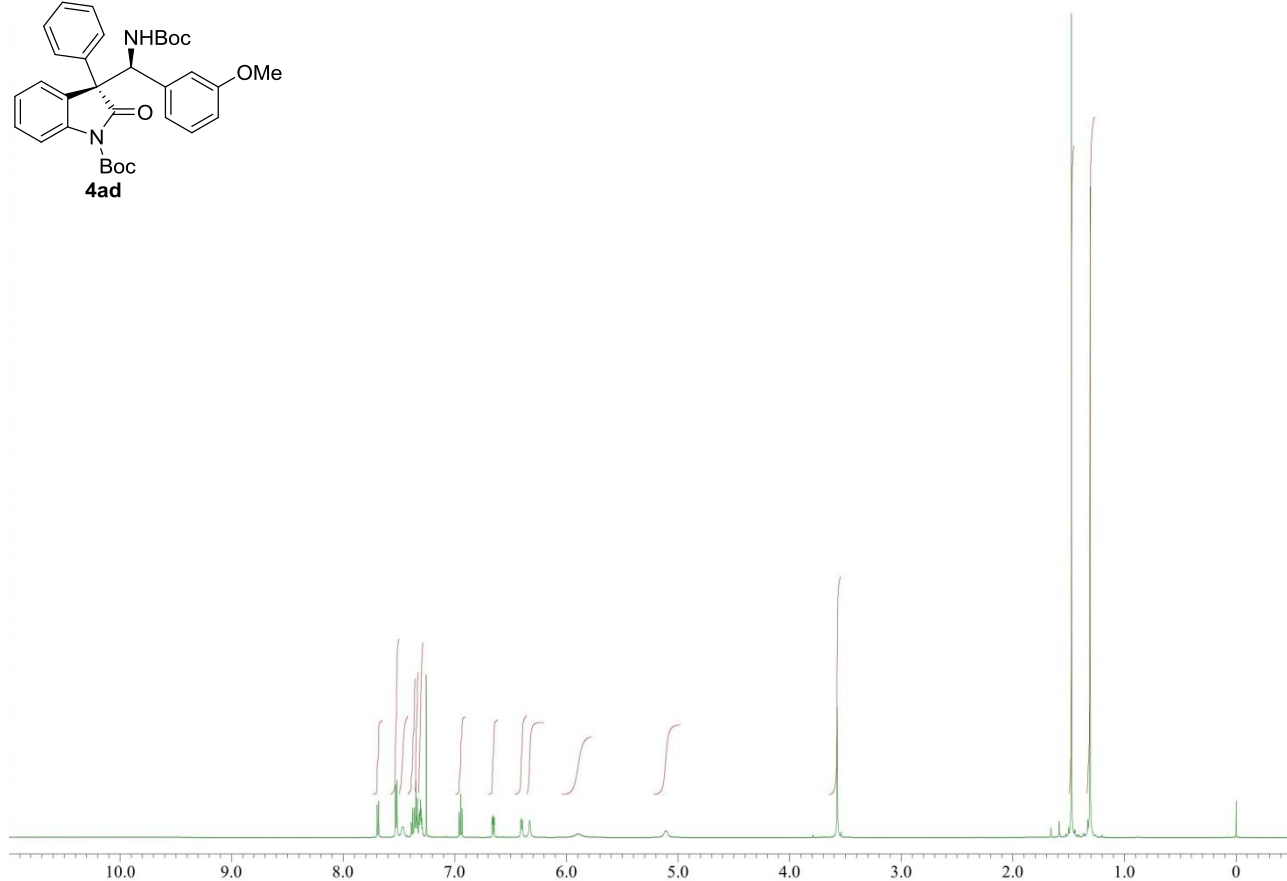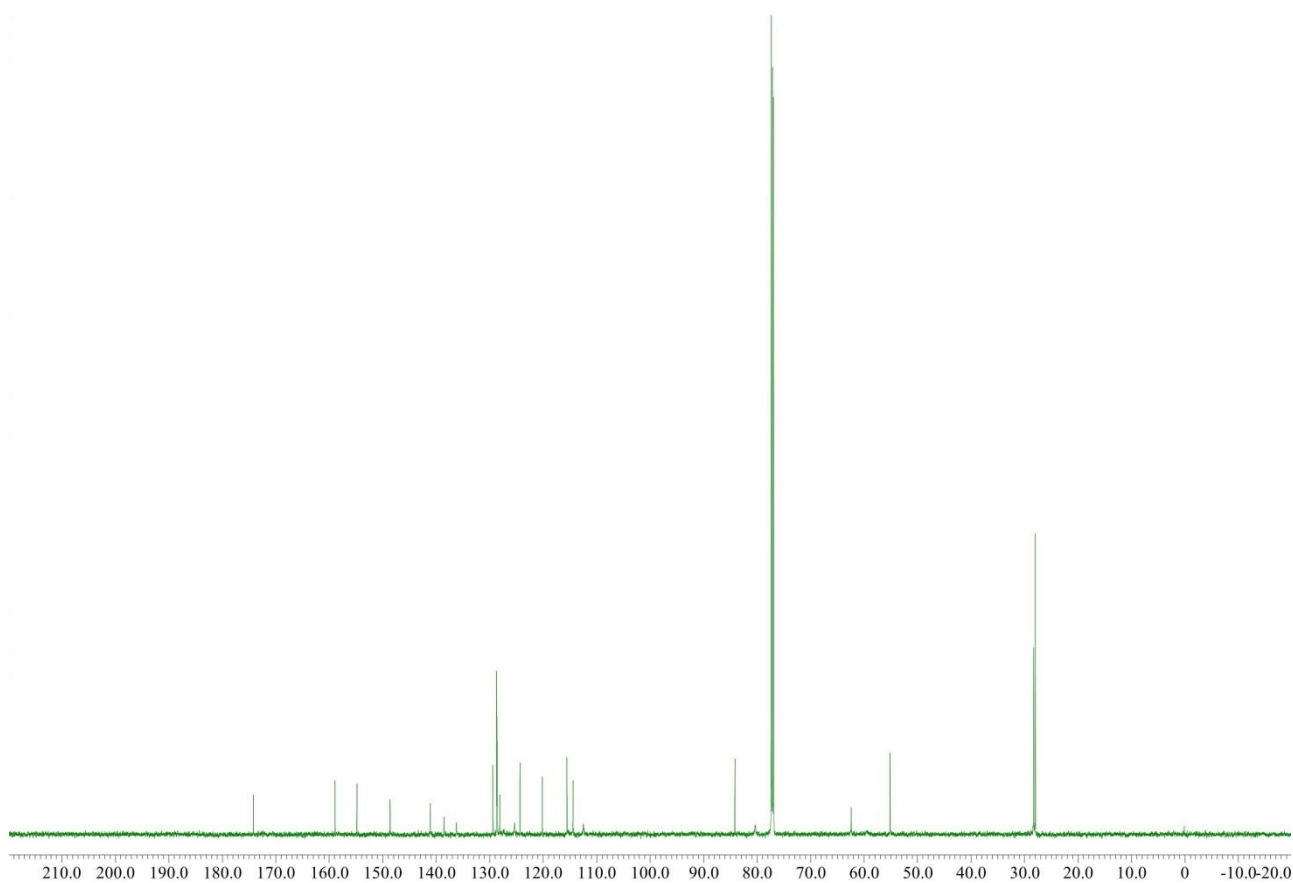

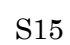

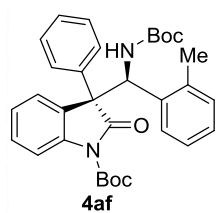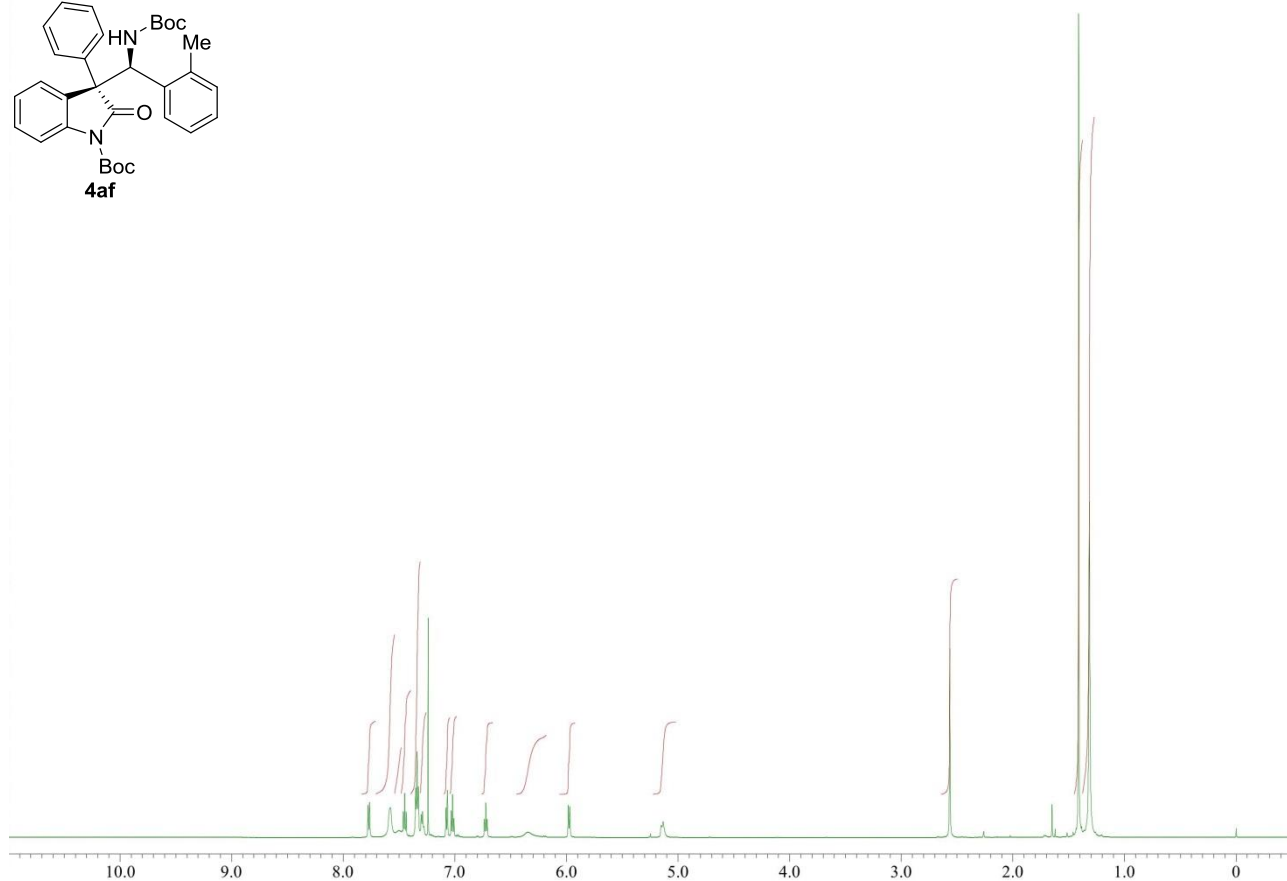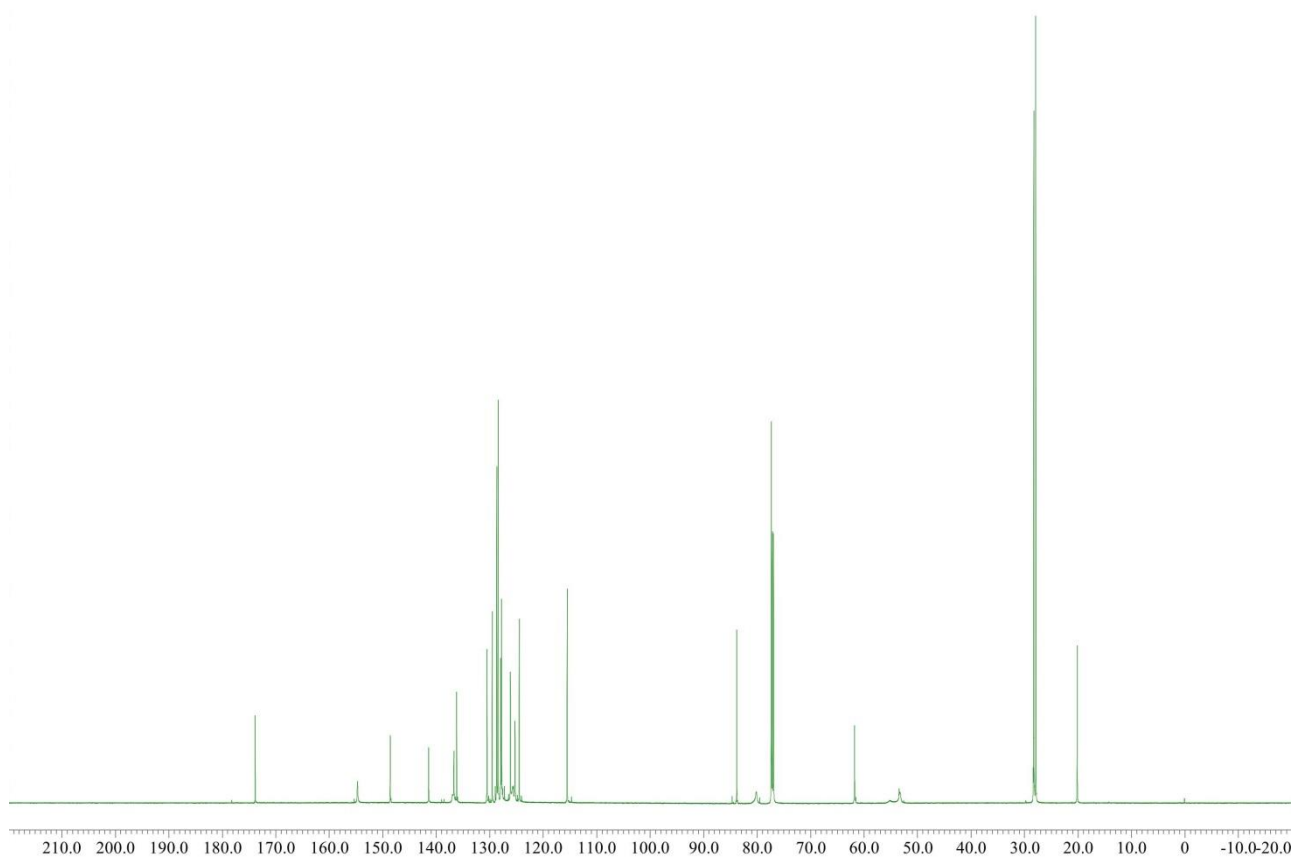



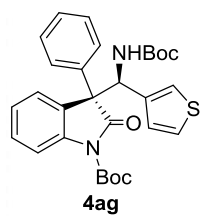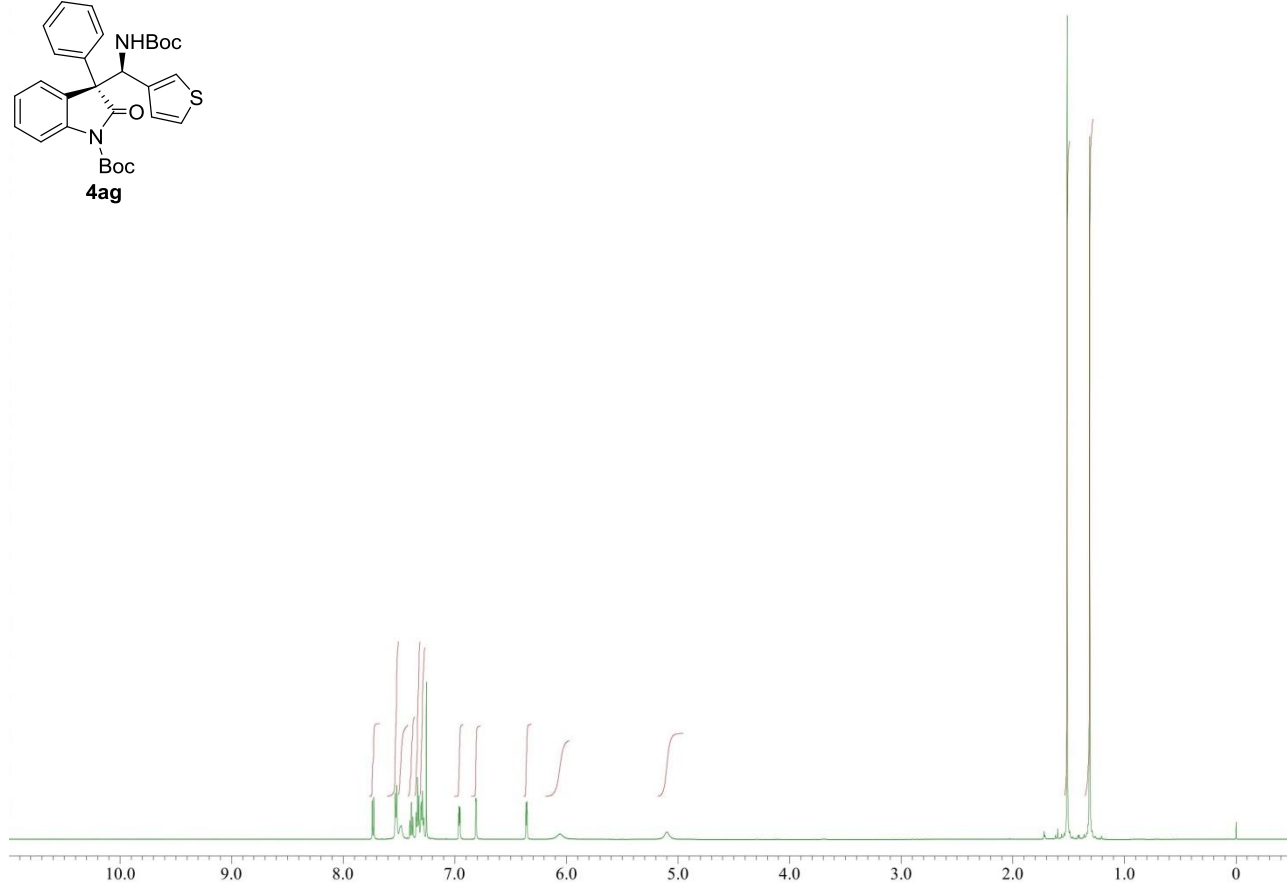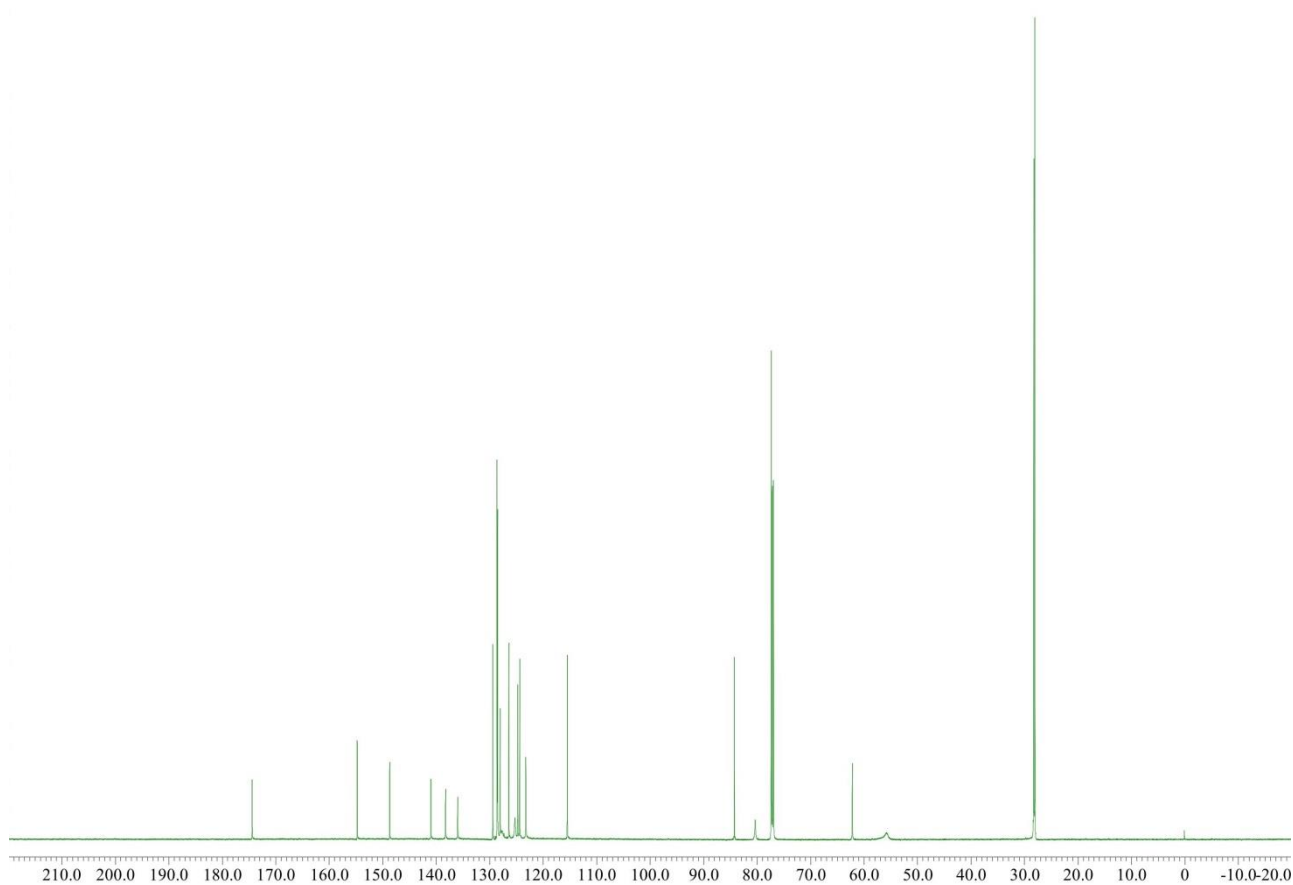

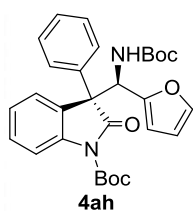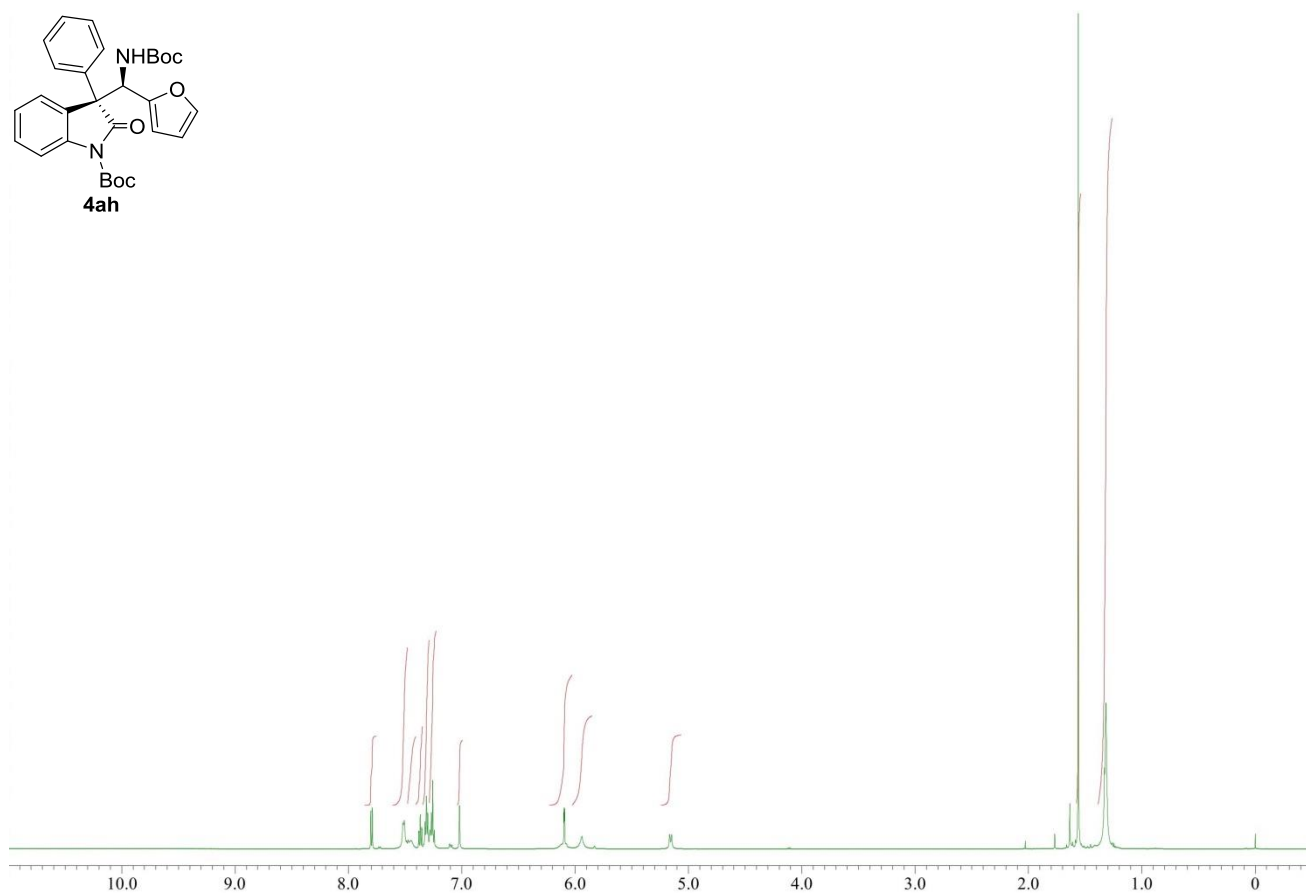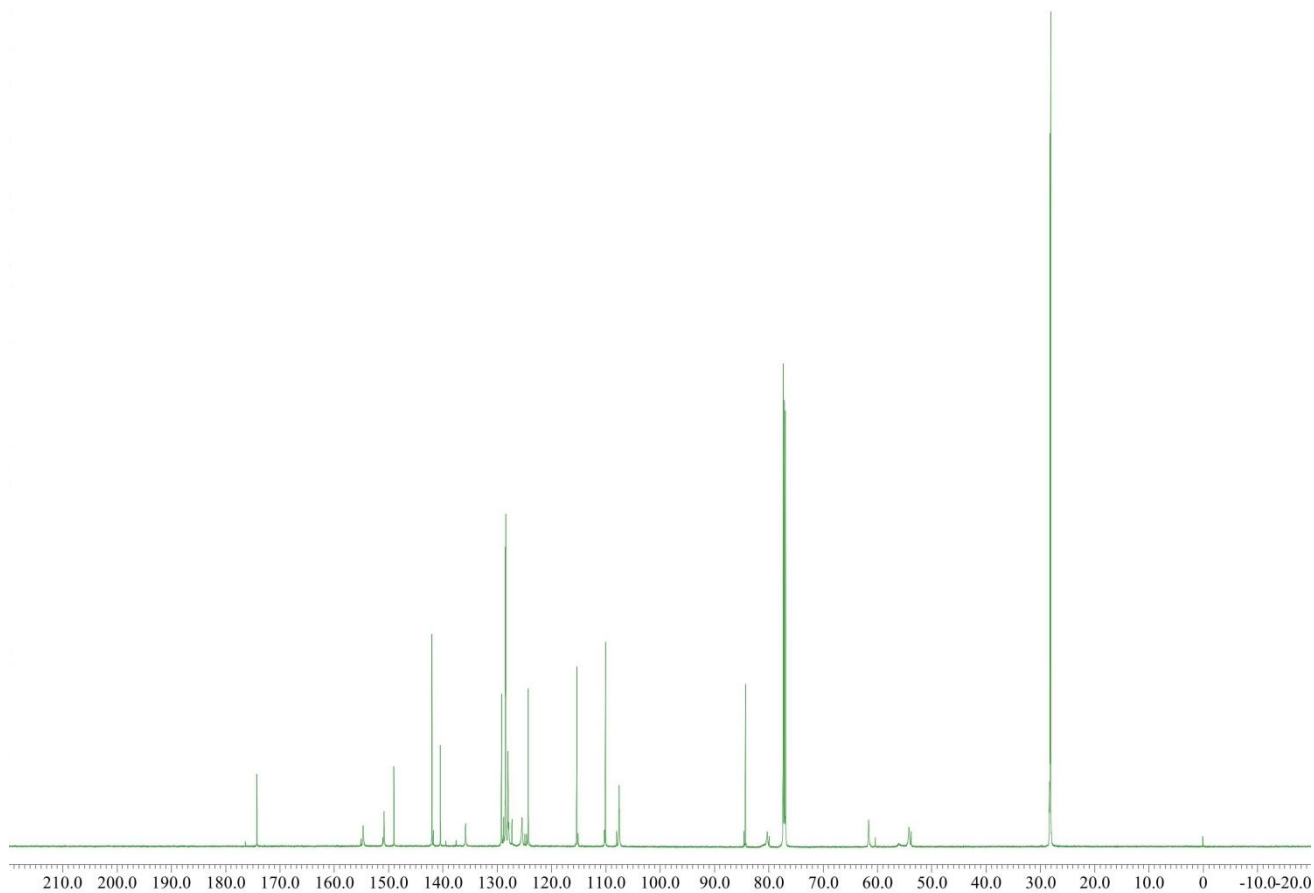

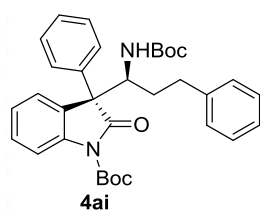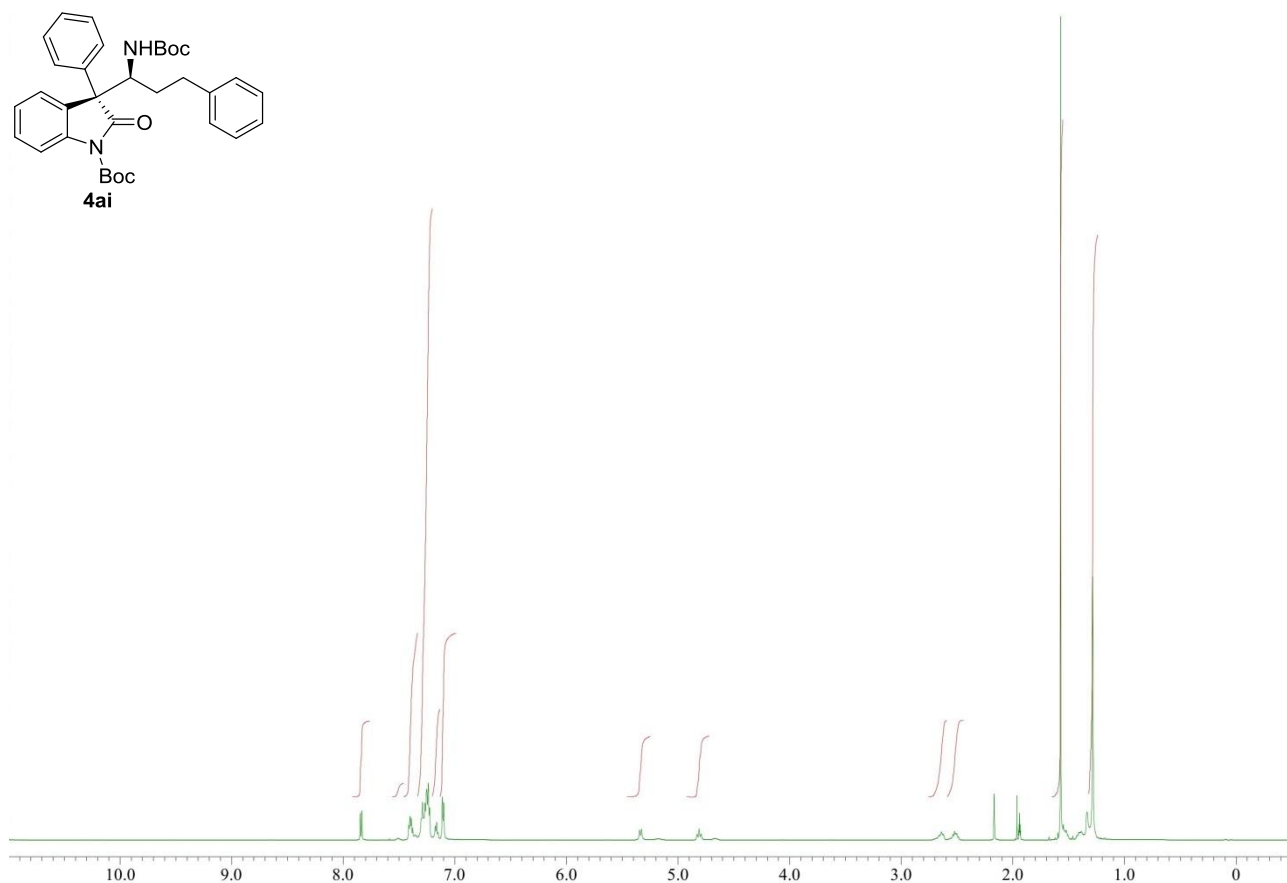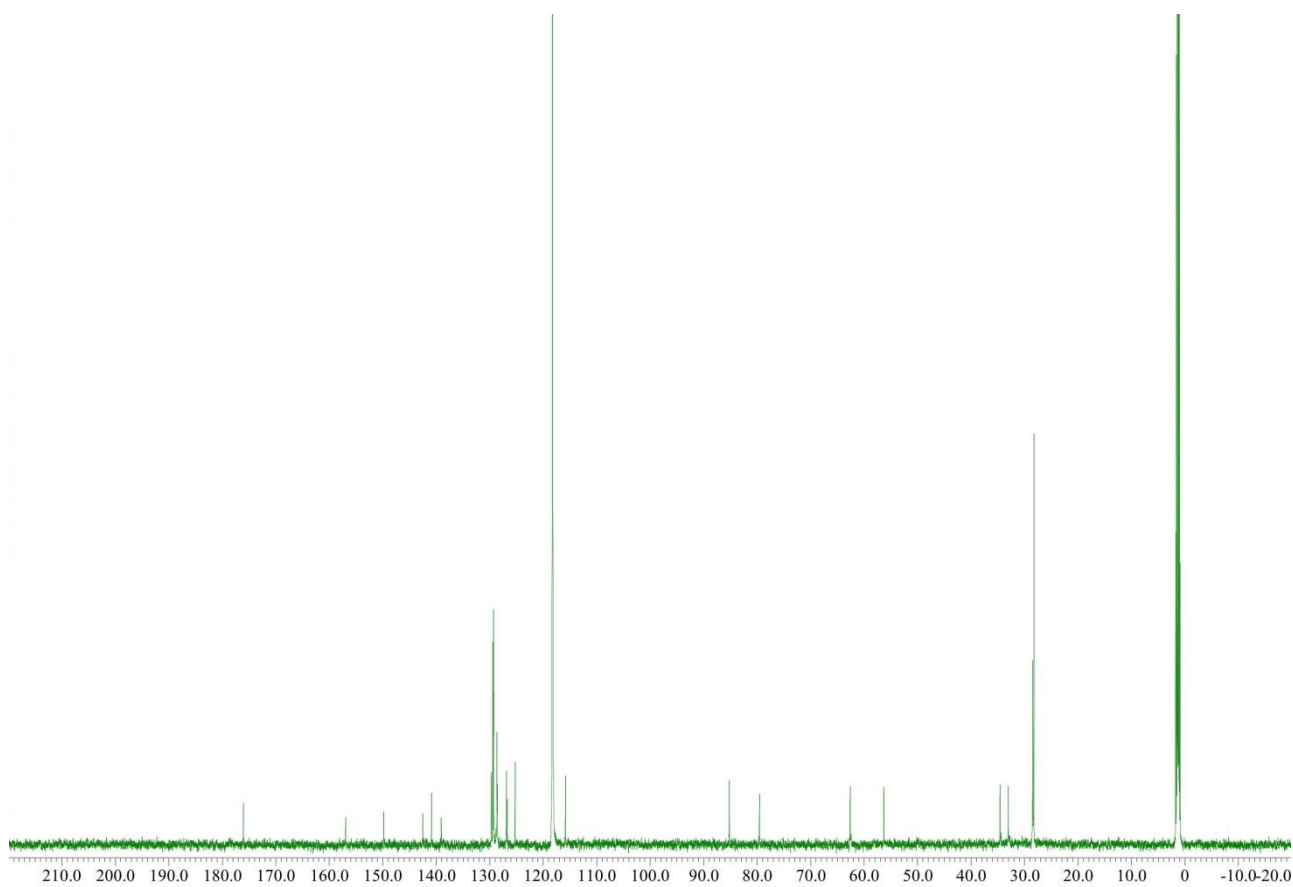

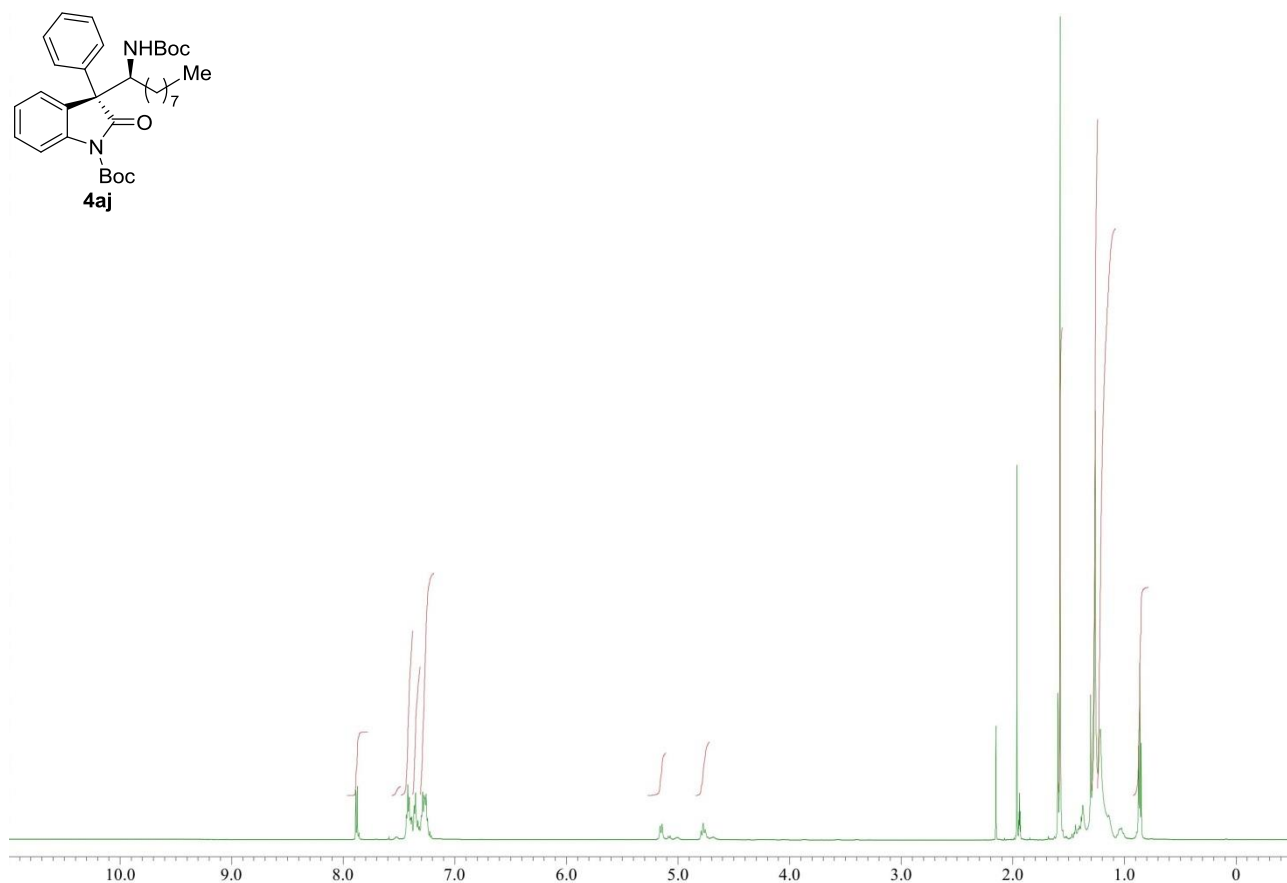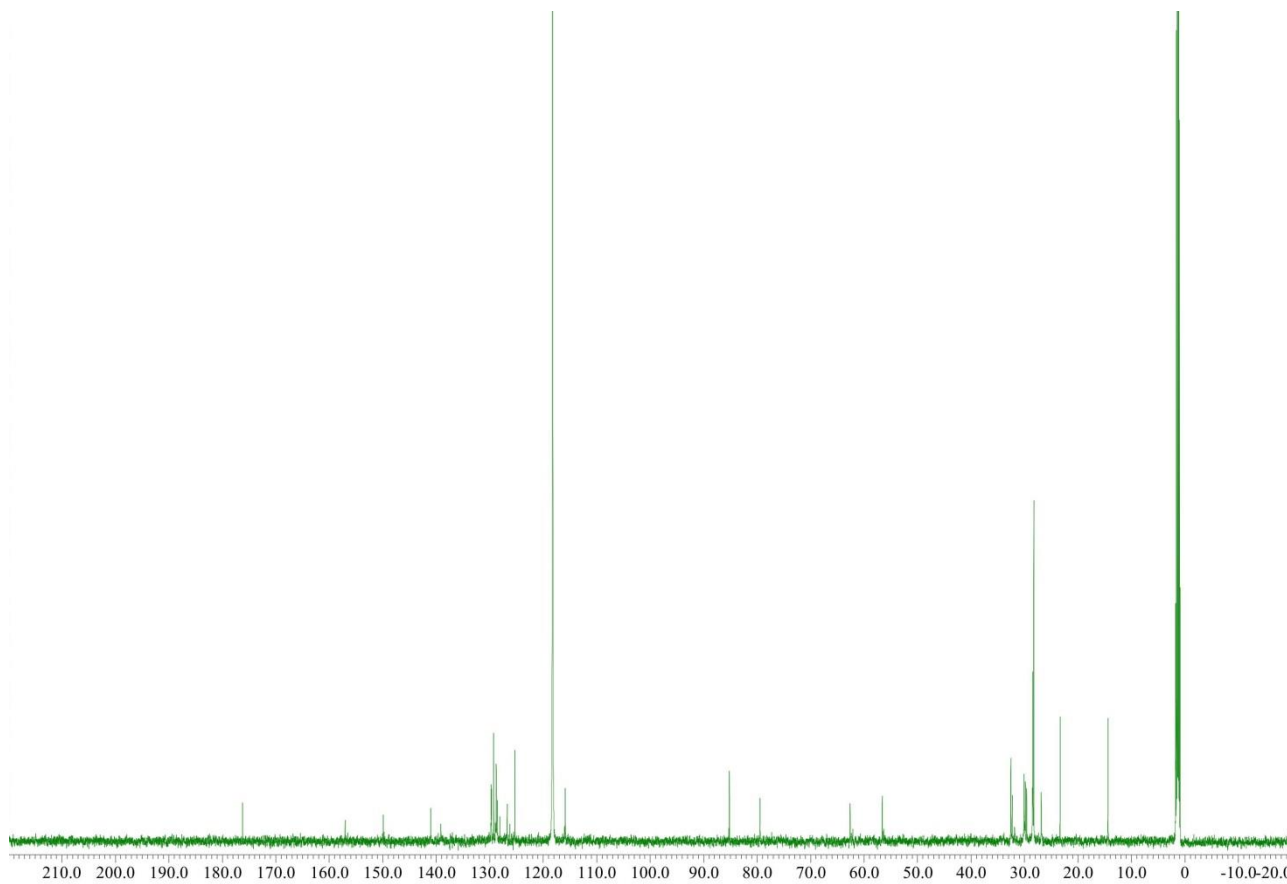

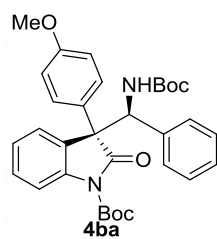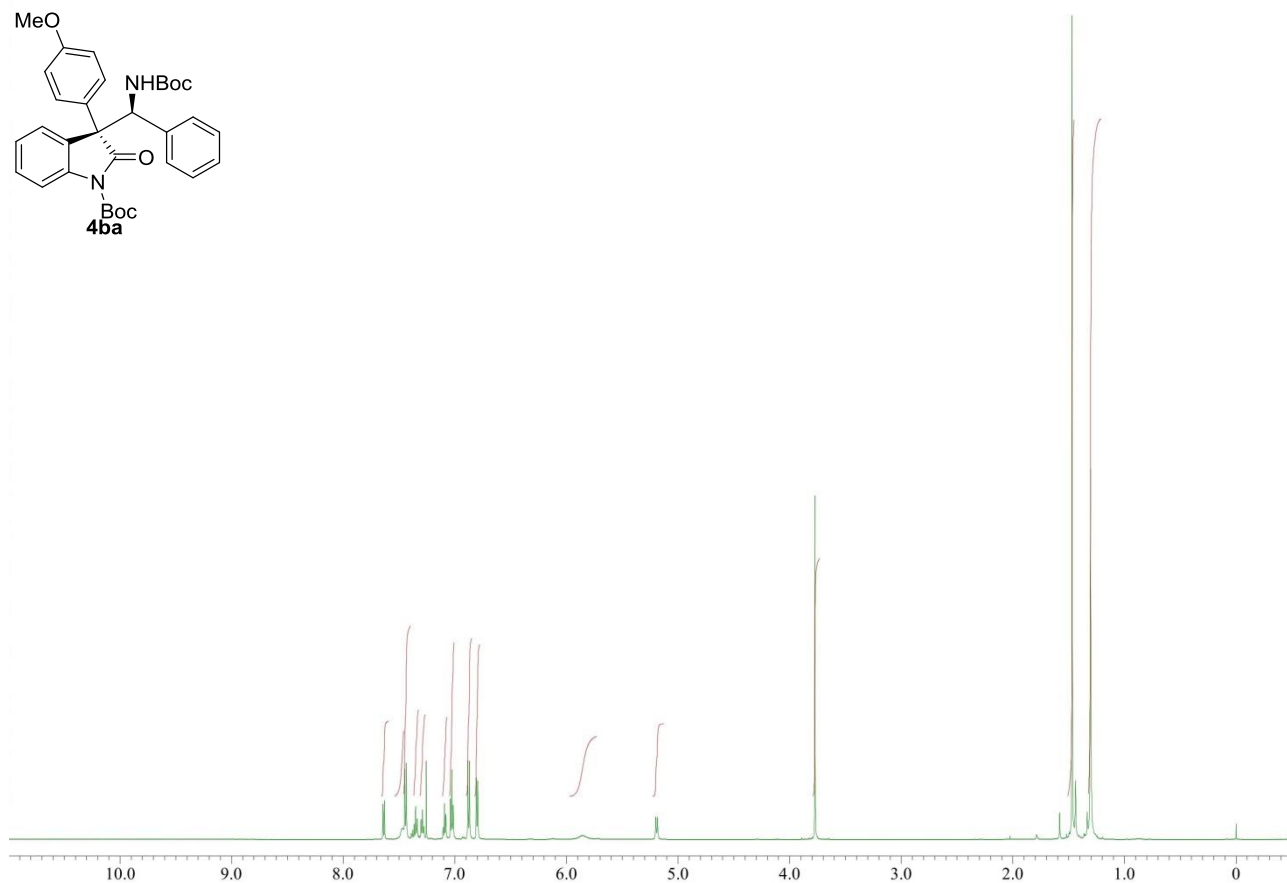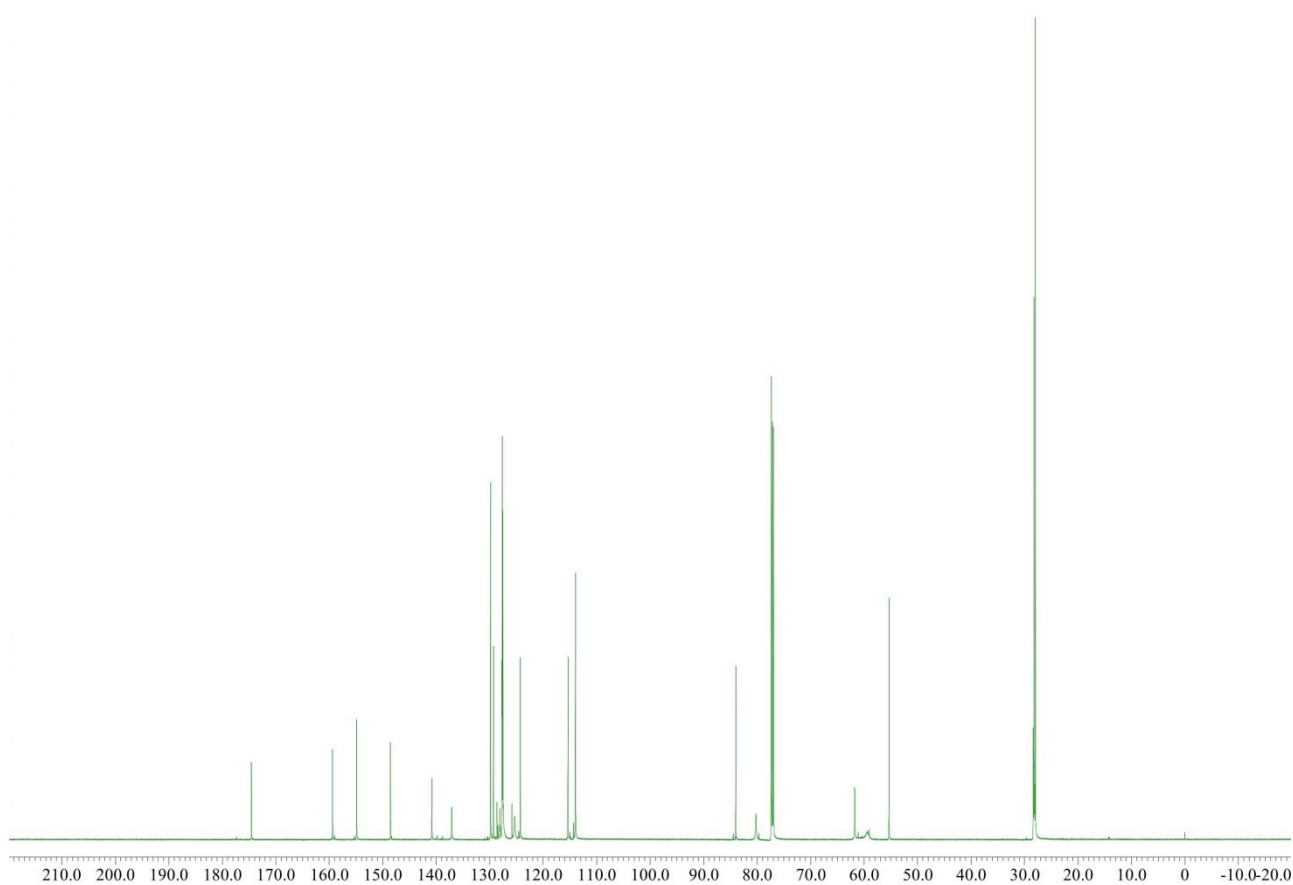

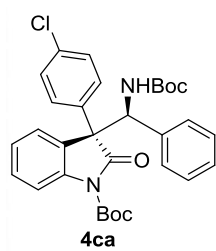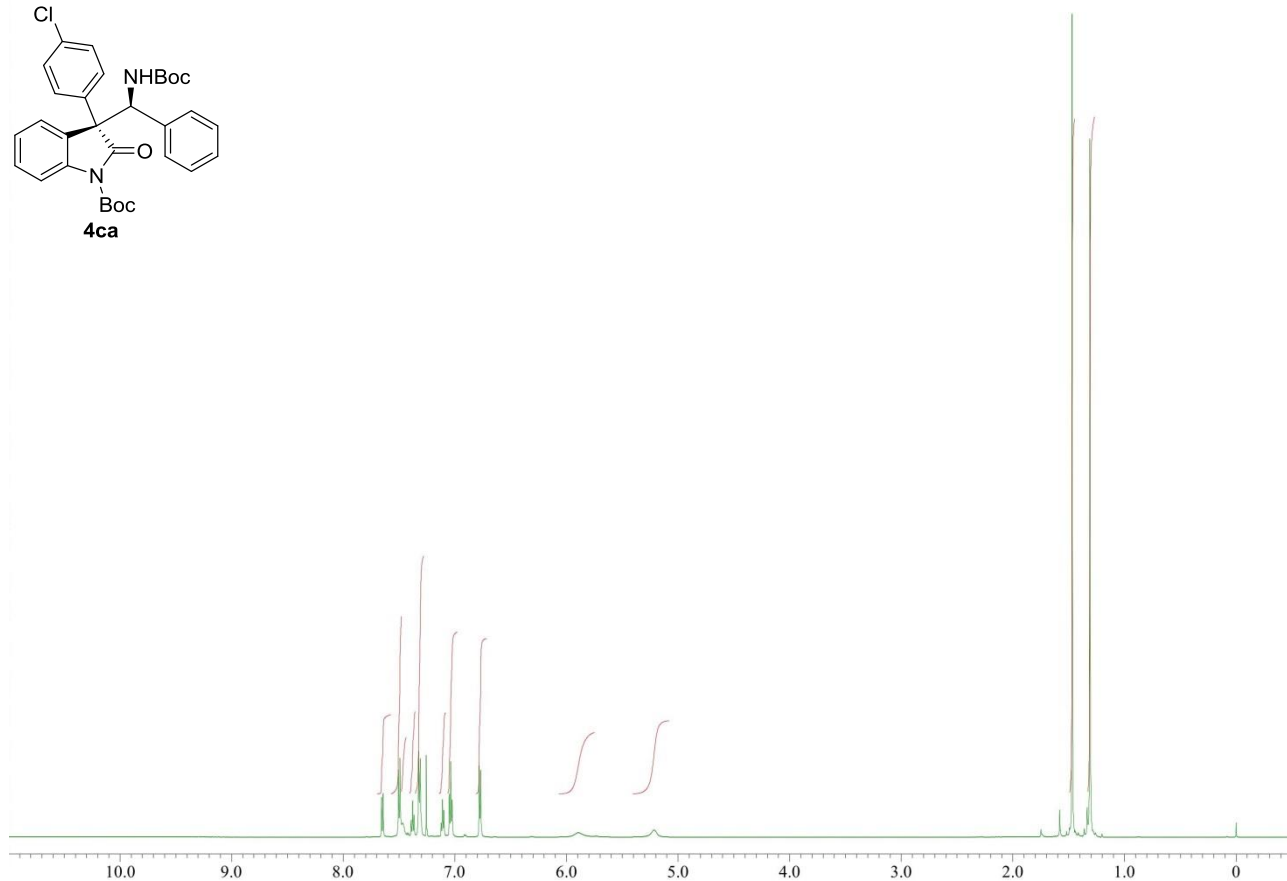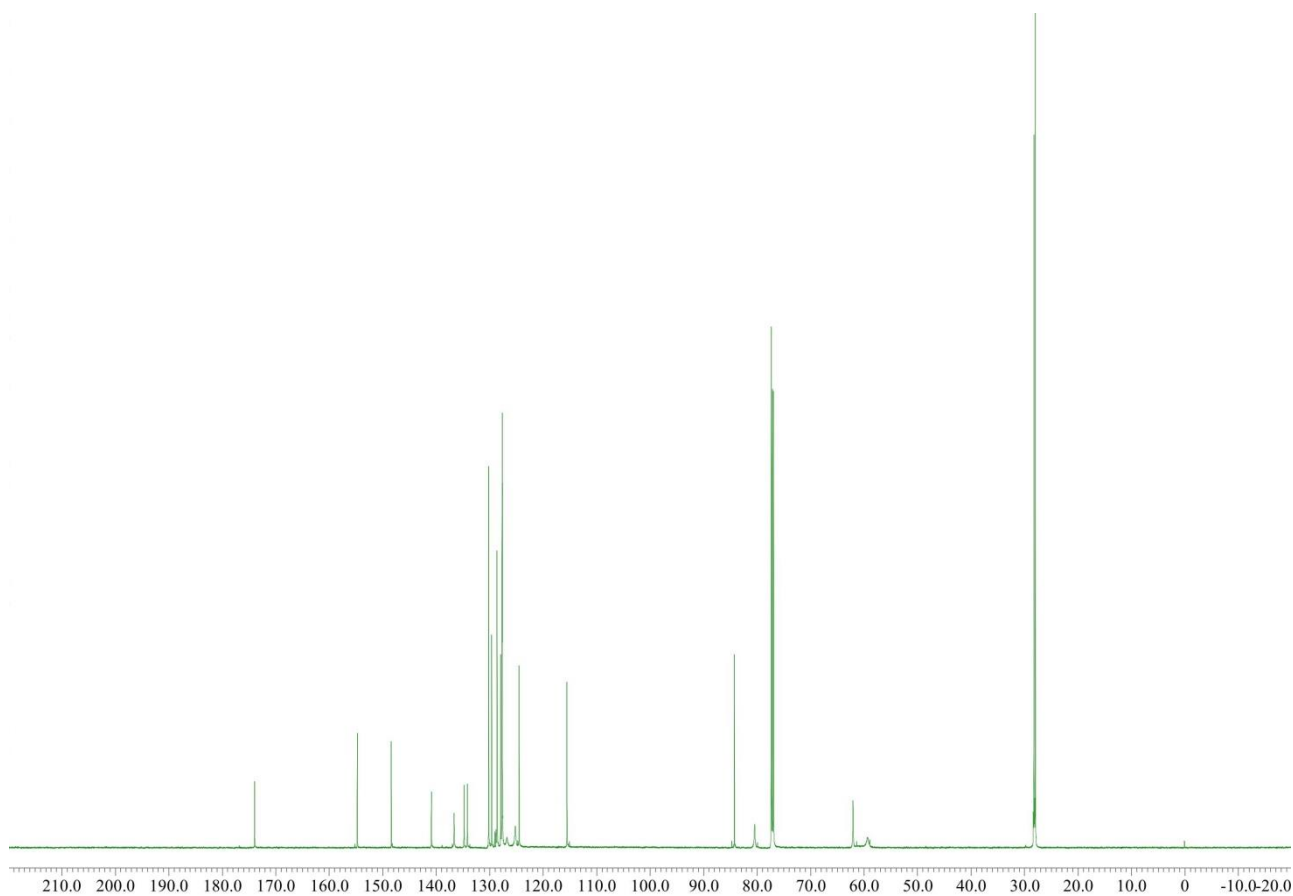

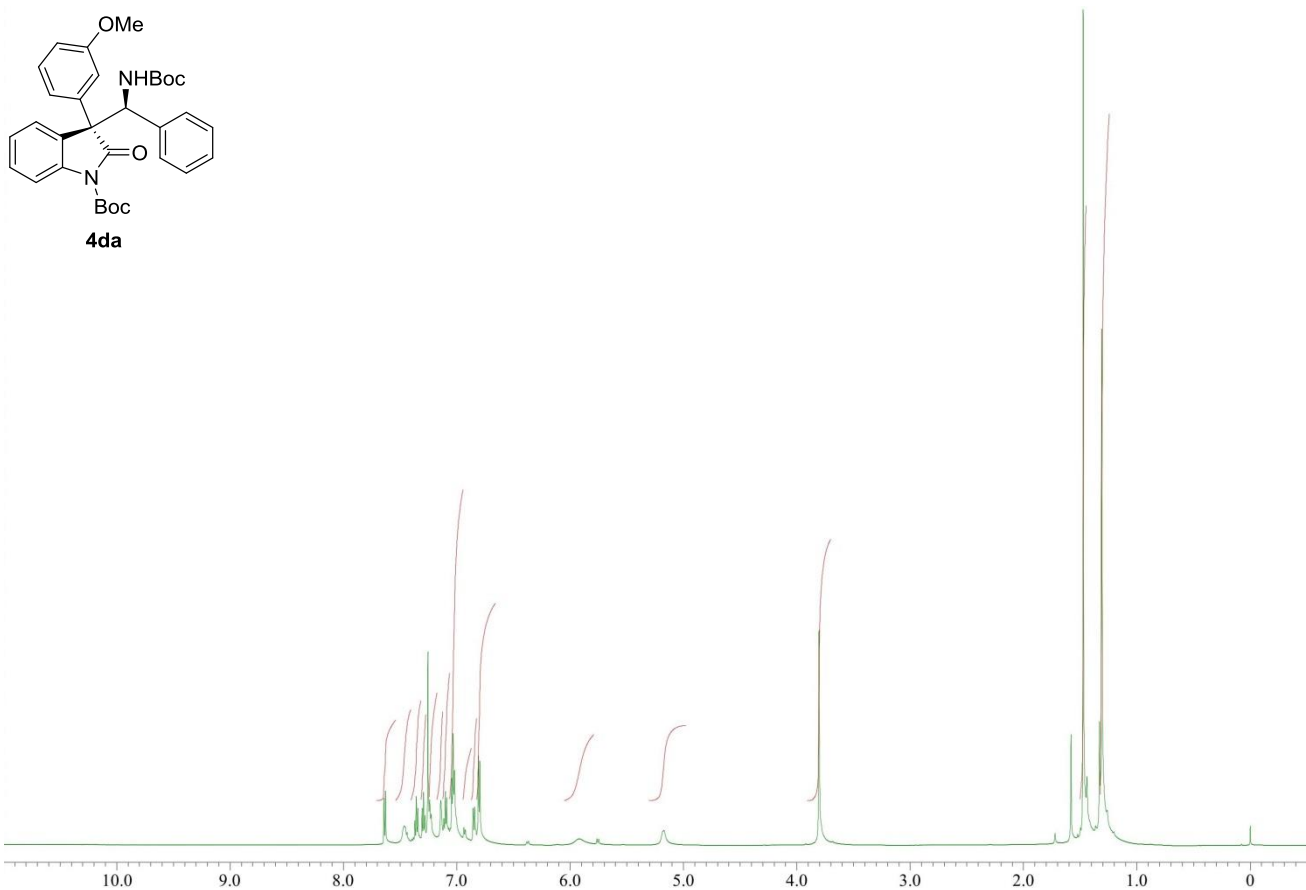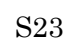

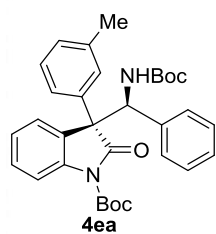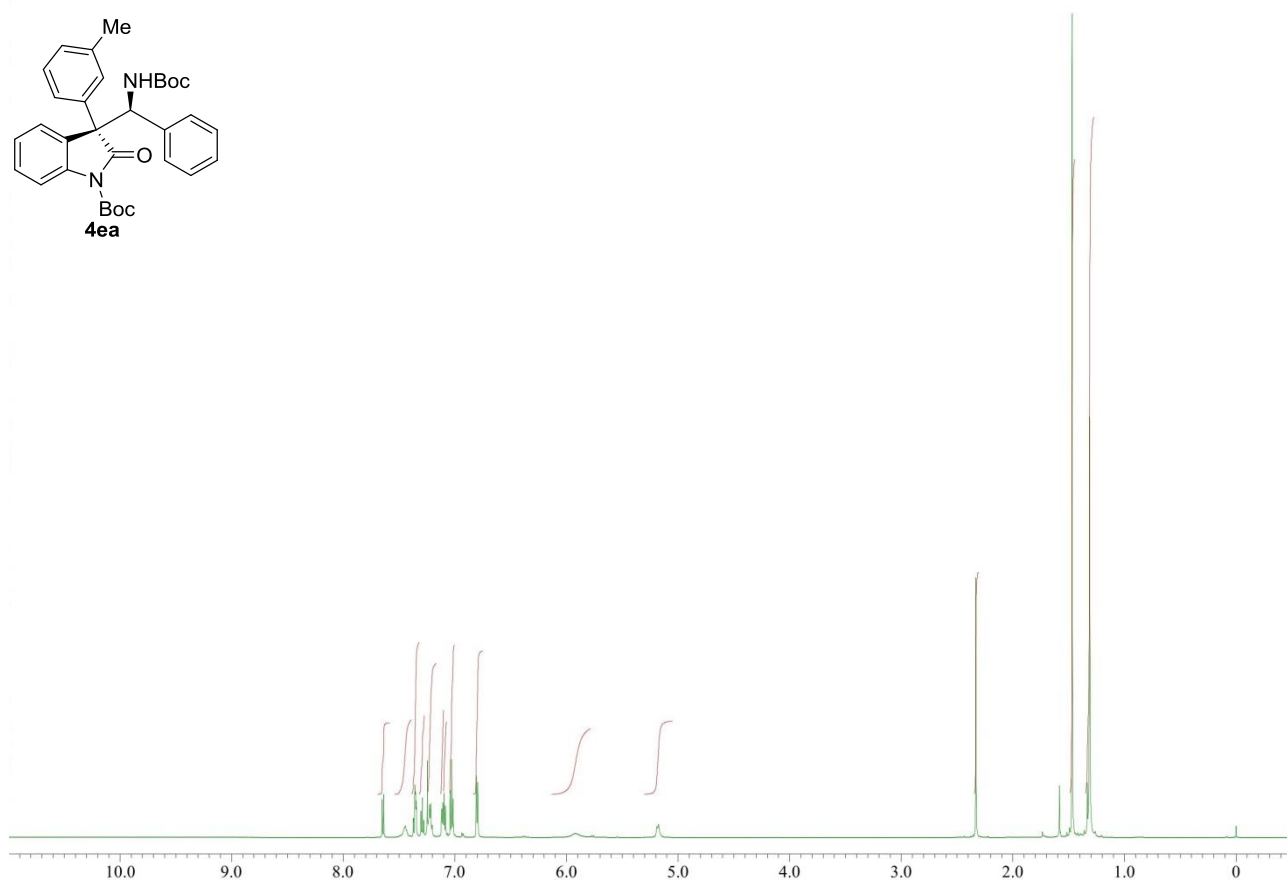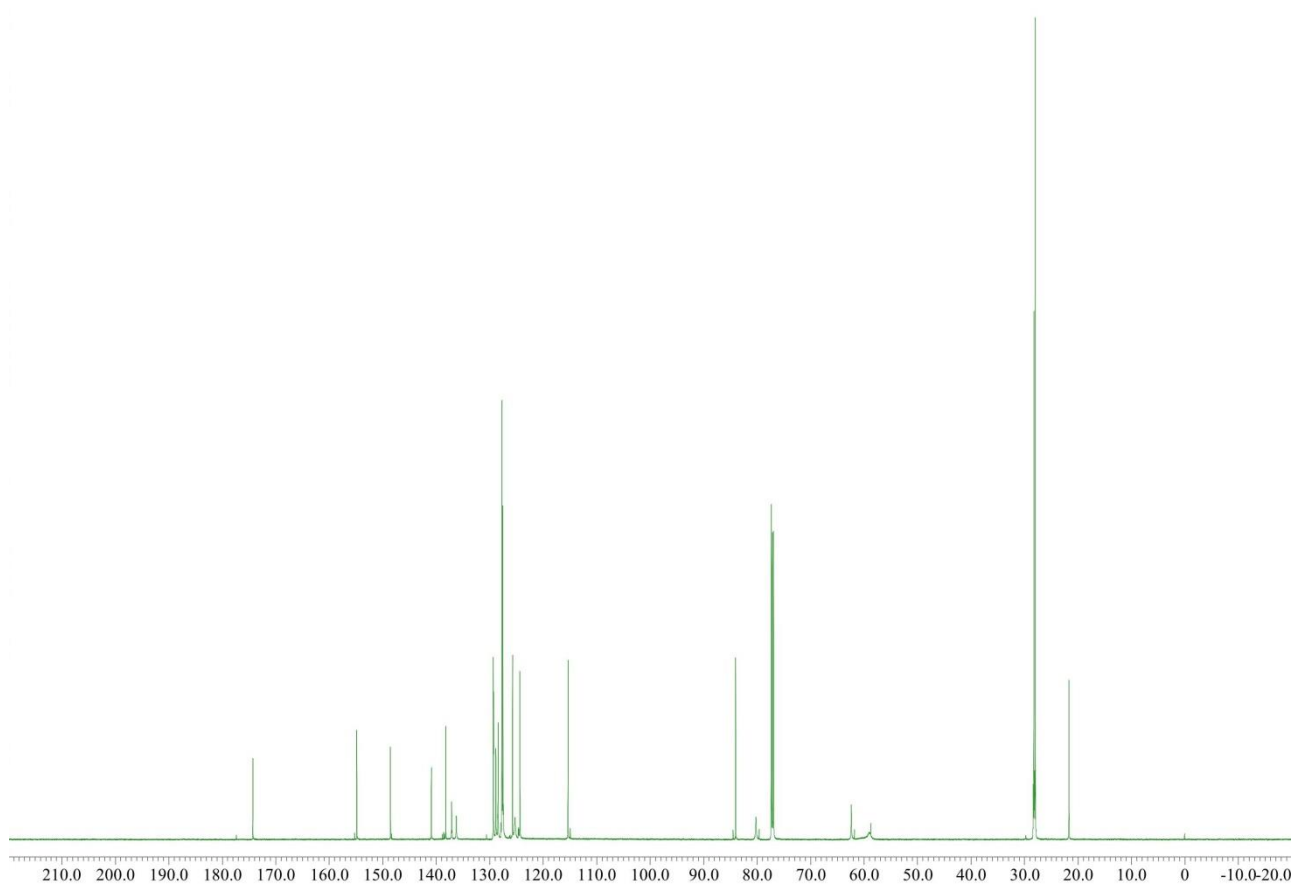



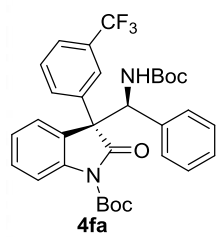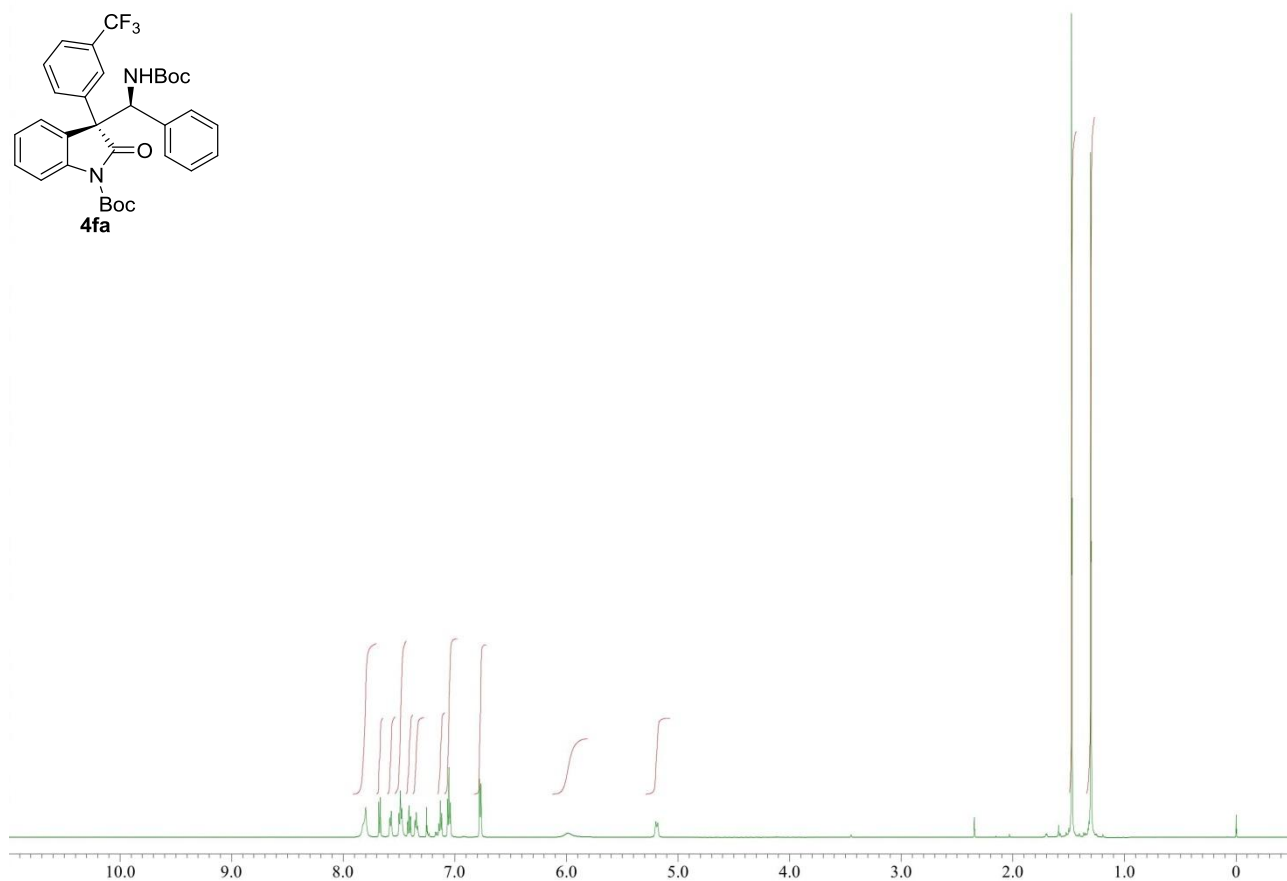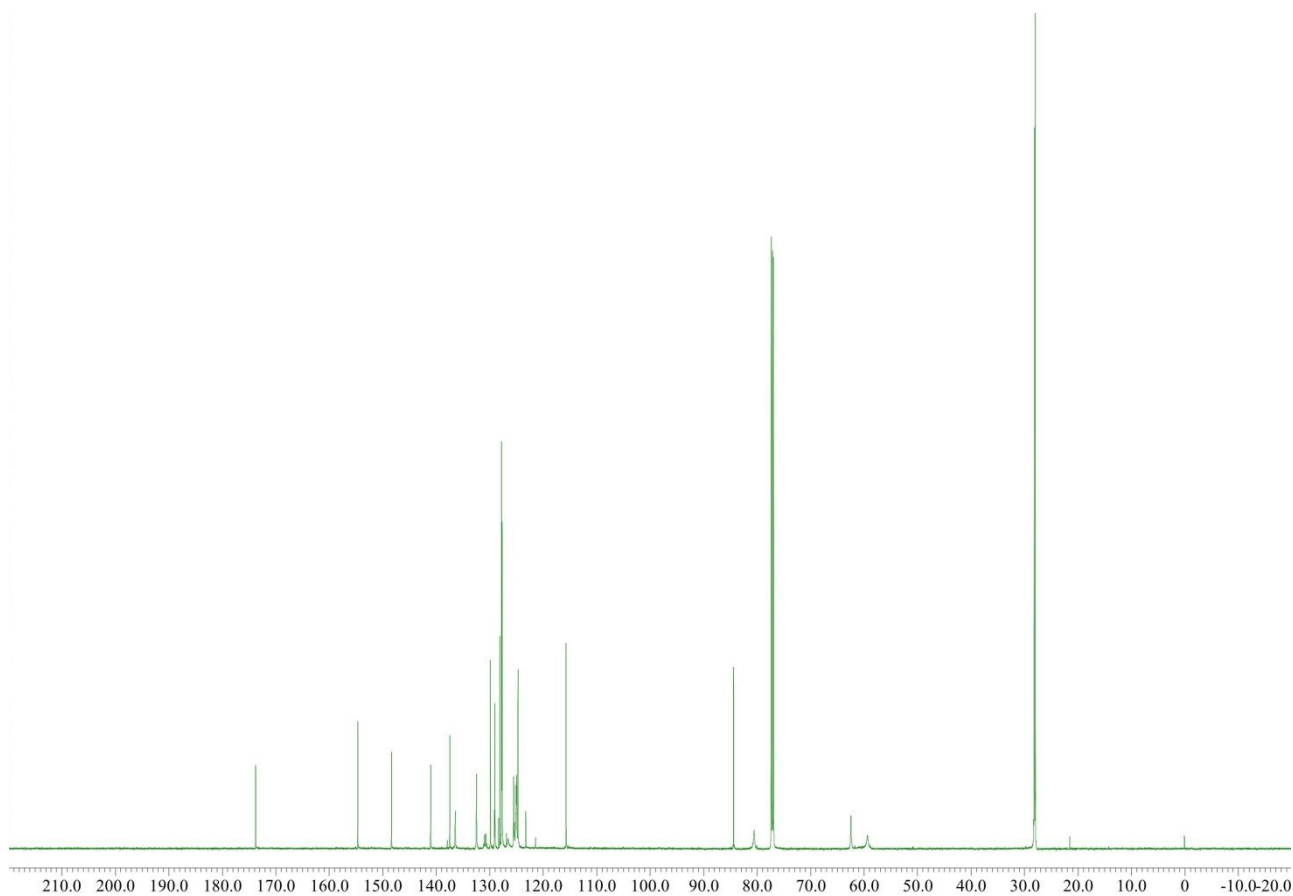

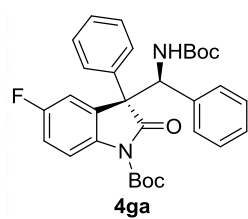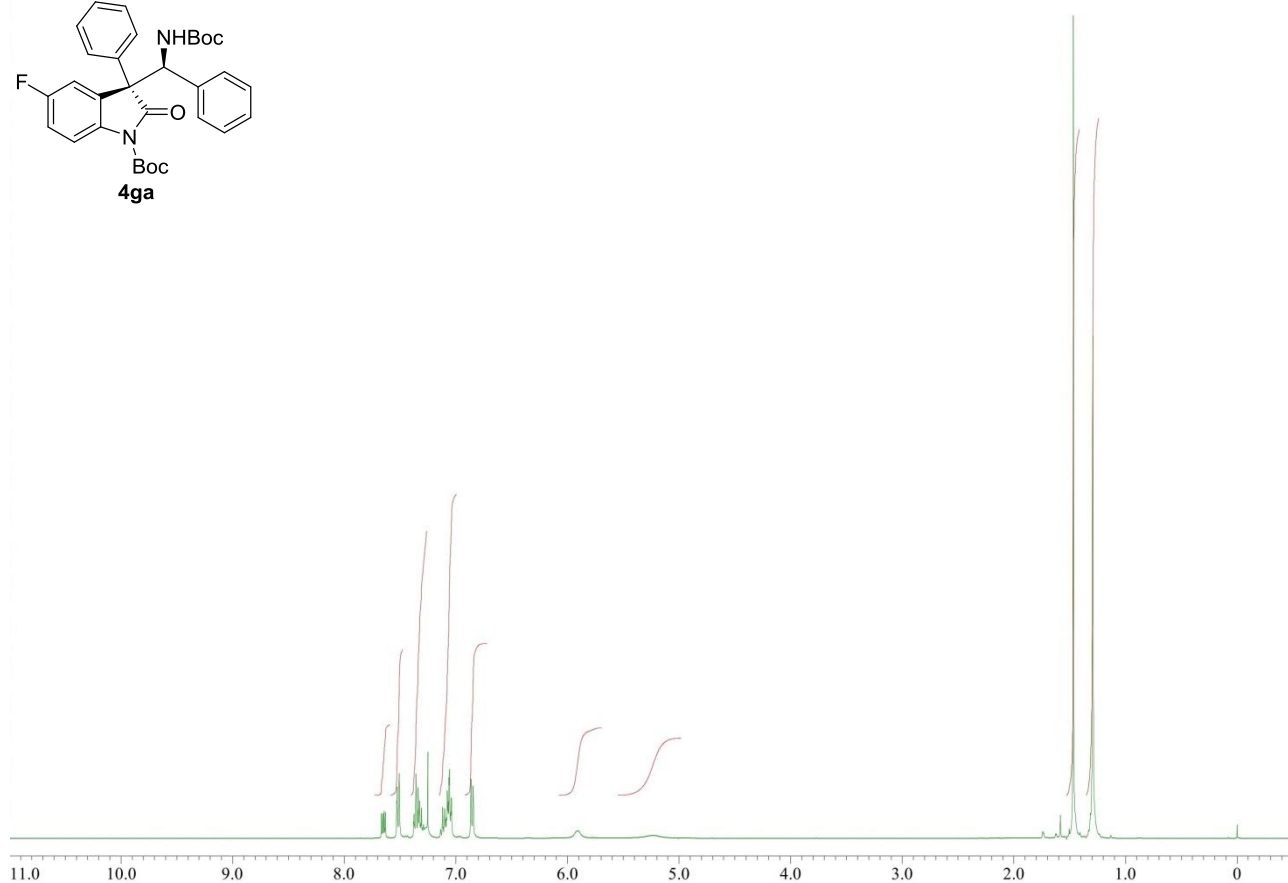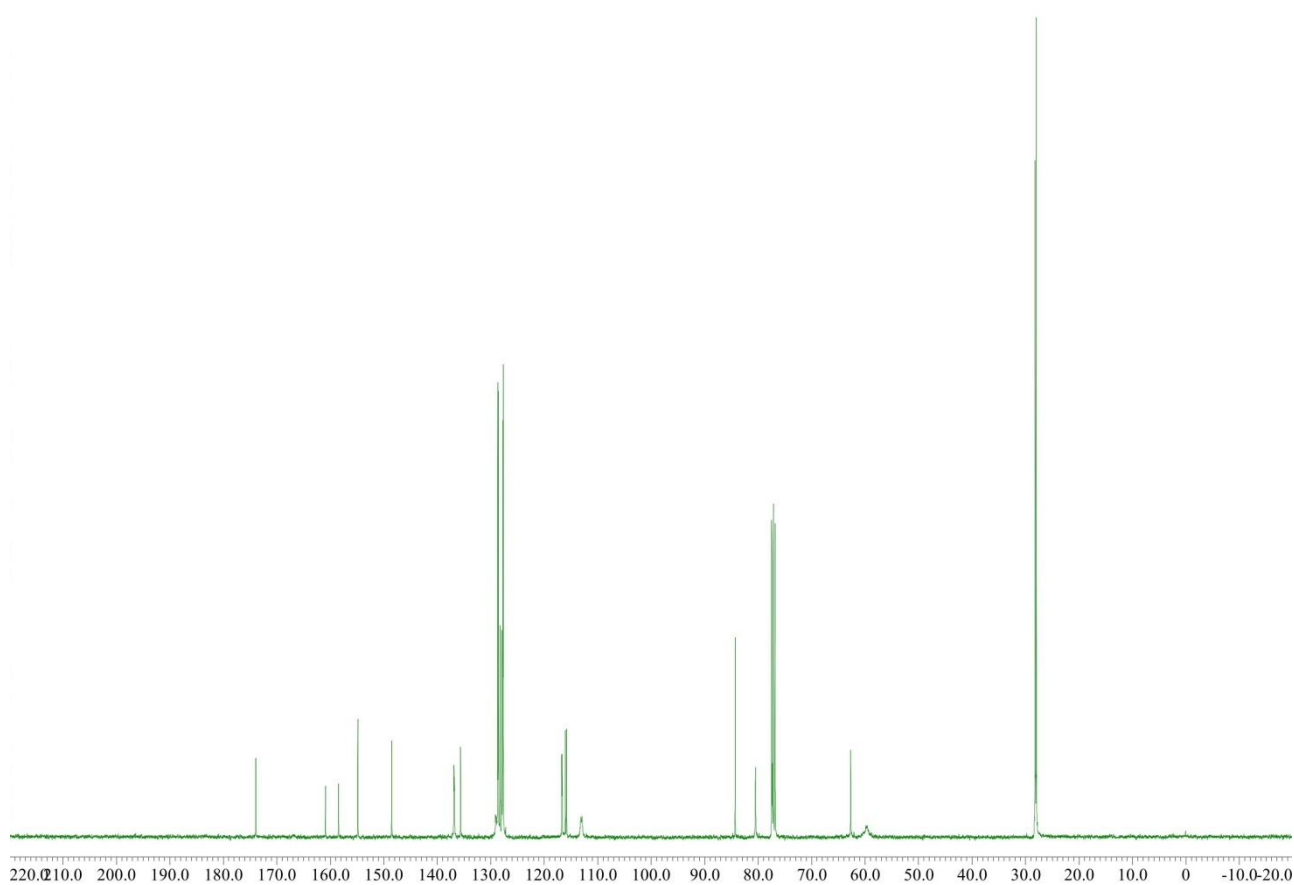

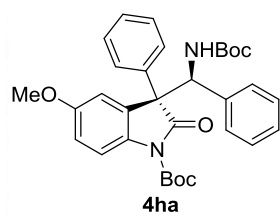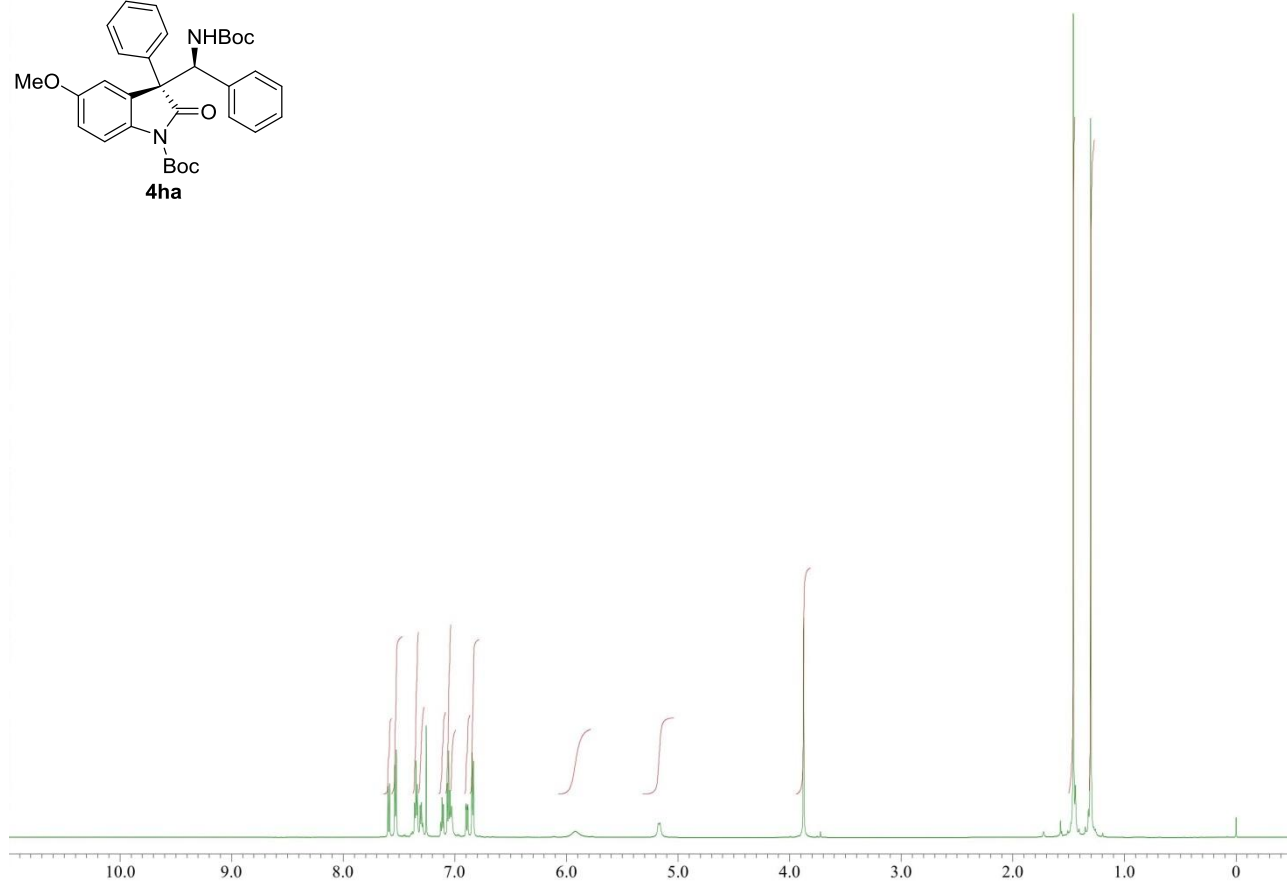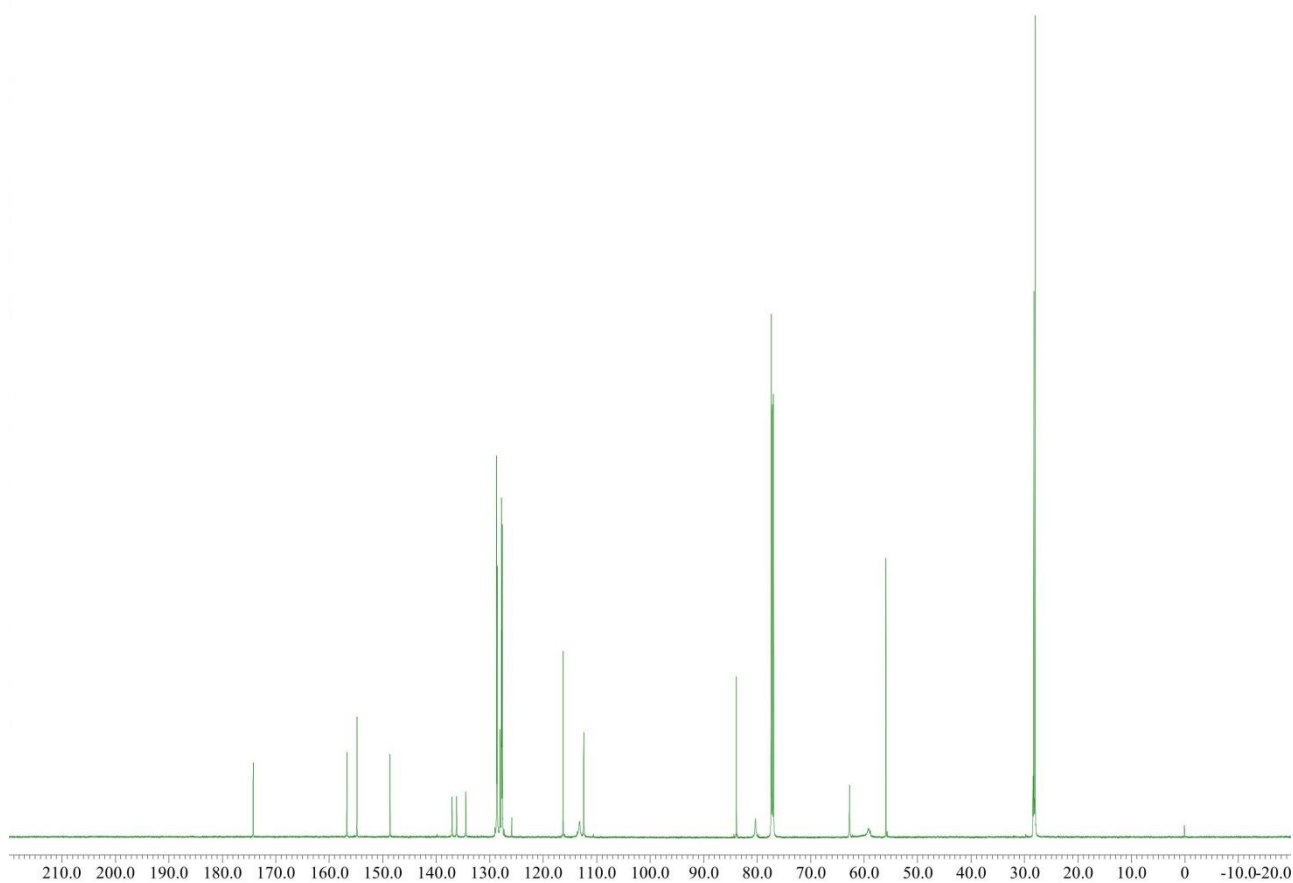

## HPLC traces:

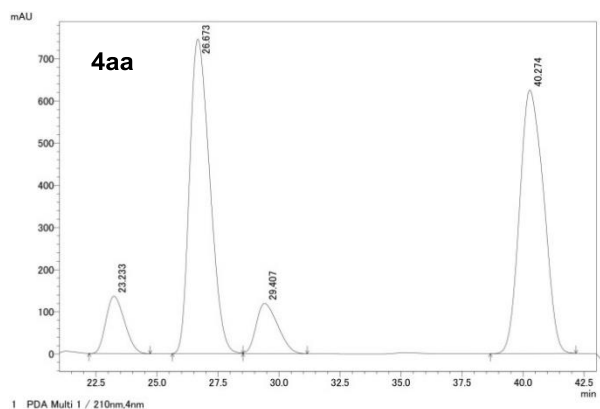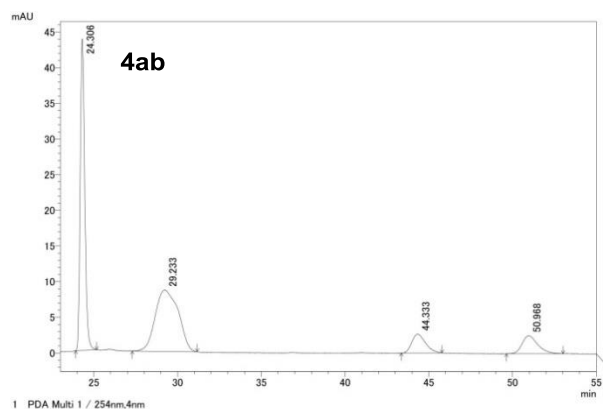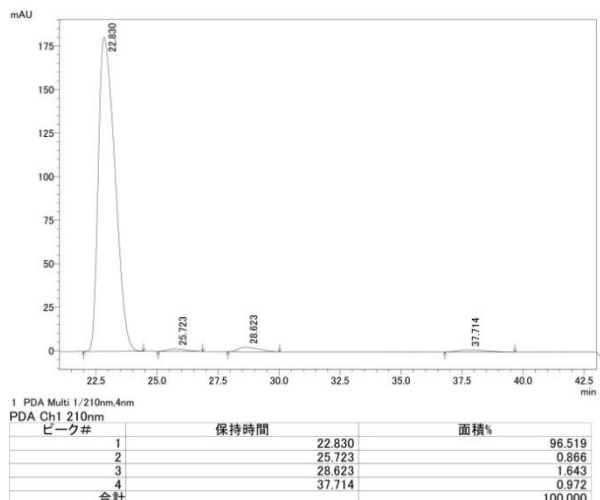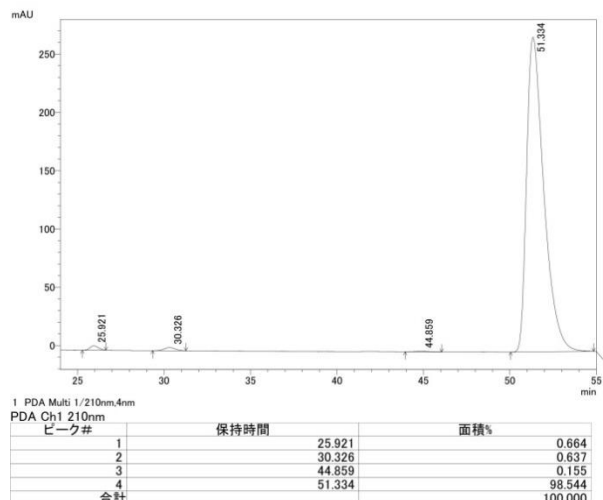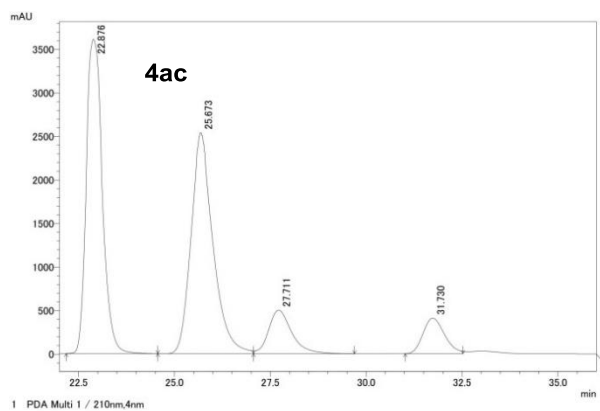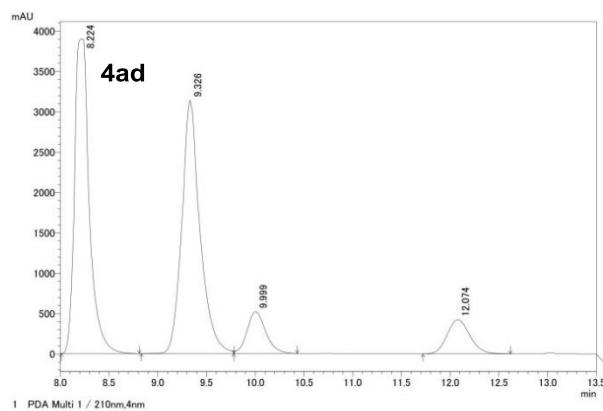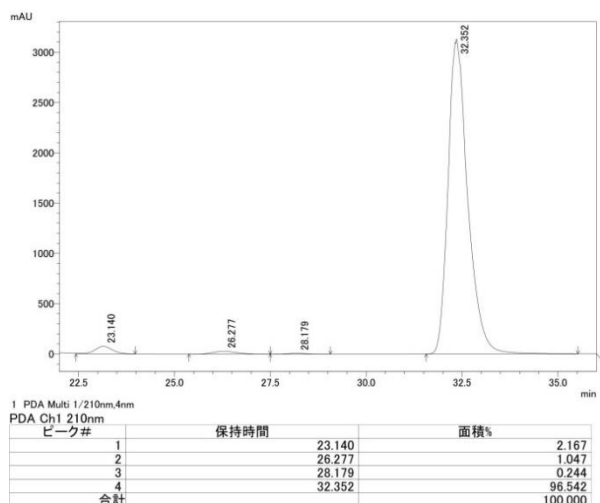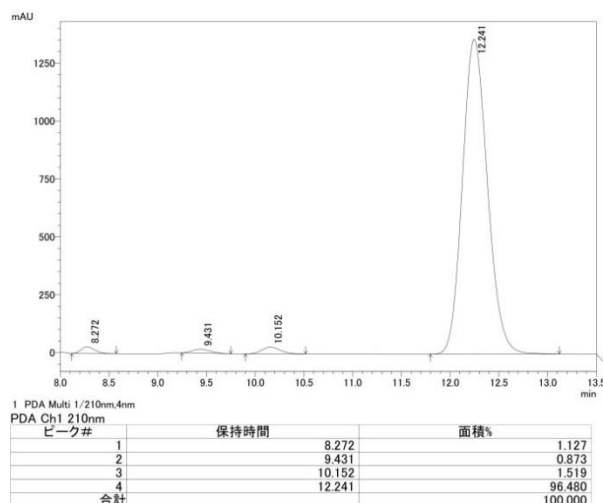

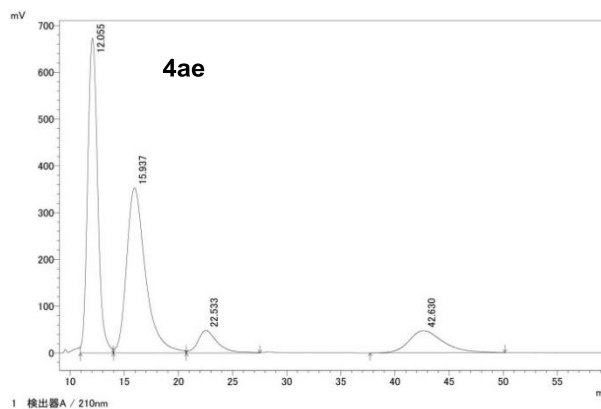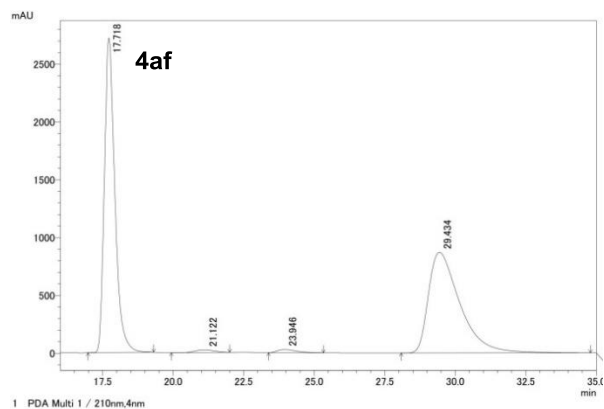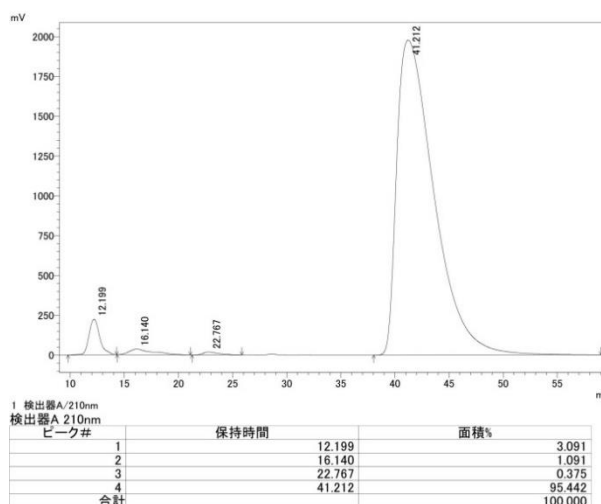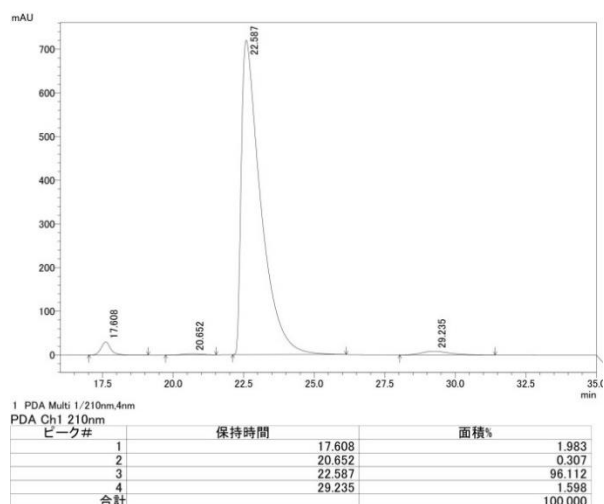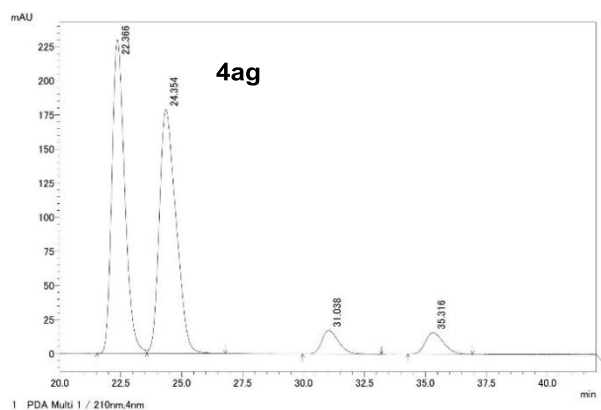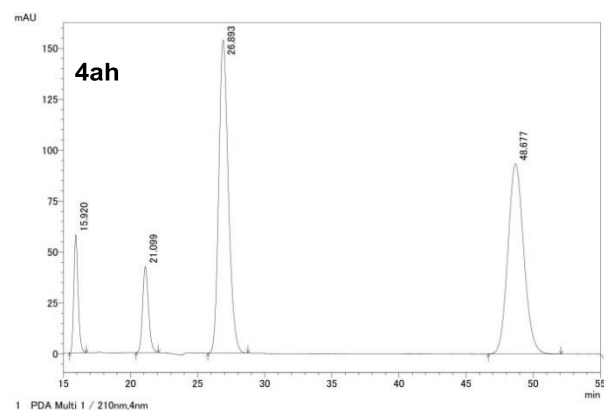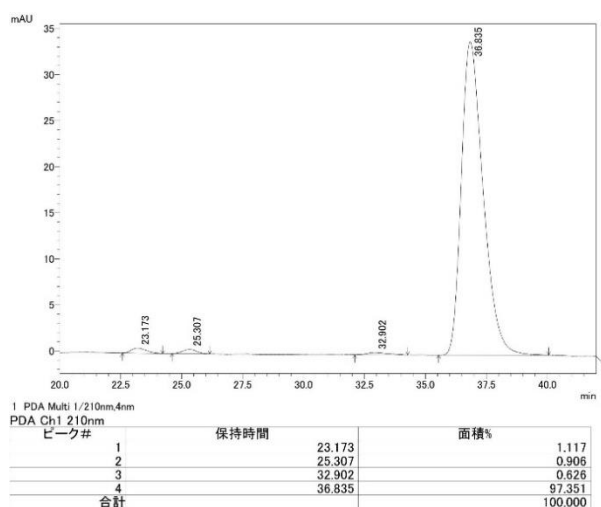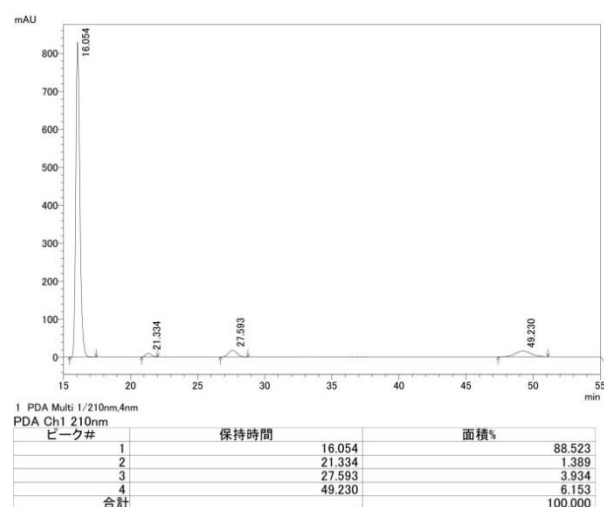

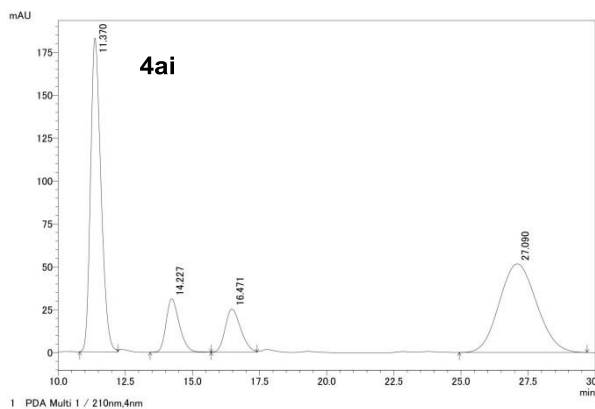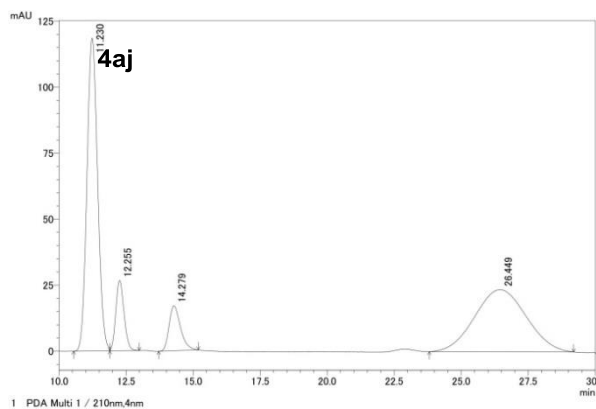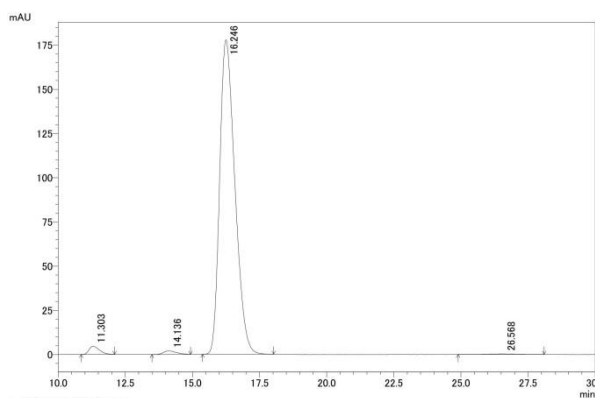

| ピーク# | 保持時間   | 面積%     |
|------|--------|---------|
| 1    | 11.303 | 1.709   |
| 2    | 14.136 | 0.907   |
| 3    | 16.246 | 97.135  |
| 4    | 26.568 | 0.249   |
| 合計   |        | 100.000 |

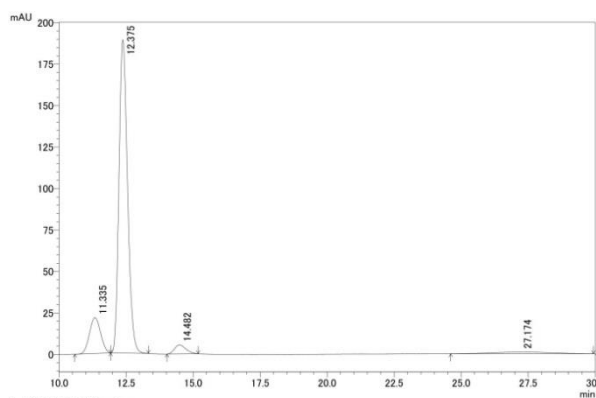

| ピーク# | 保持時間   | 面積%     |
|------|--------|---------|
| 1    | 11.335 | 12.143  |
| 2    | 12.375 | 81.692  |
| 3    | 14.482 | 3.102   |
| 4    | 27.174 | 3.063   |
| 合計   |        | 100.000 |

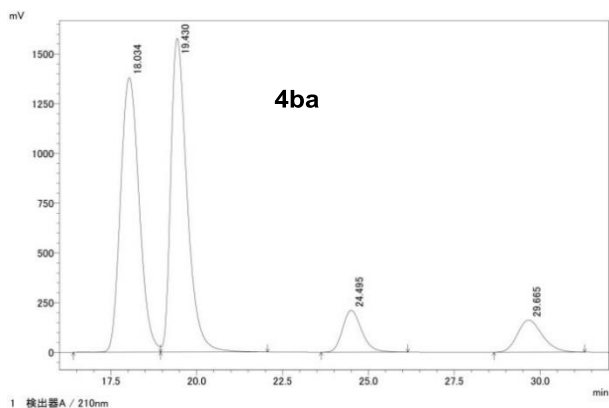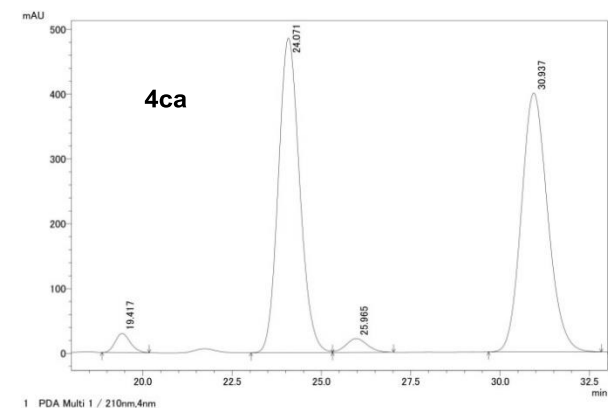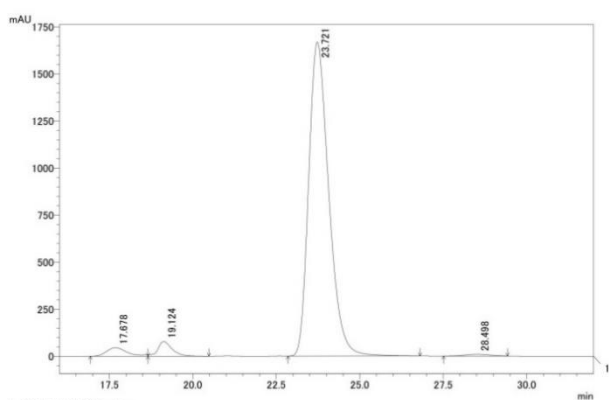

| ピーク# | 保持時間   | 面積%     |
|------|--------|---------|
| 1    | 17.678 | 2.589   |
| 2    | 19.124 | 3.083   |
| 3    | 23.721 | 93.711  |
| 4    | 28.498 | 0.617   |
| 合計   |        | 100.000 |

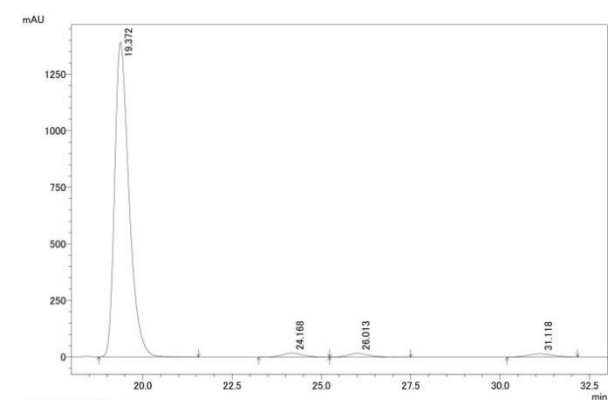

| ピーク# | 保持時間   | 面積%     |
|------|--------|---------|
| 1    | 19.372 | 95.106  |
| 2    | 24.168 | 1.666   |
| 3    | 26.013 | 1.561   |
| 4    | 31.118 | 1.667   |
| 合計   |        | 100.000 |

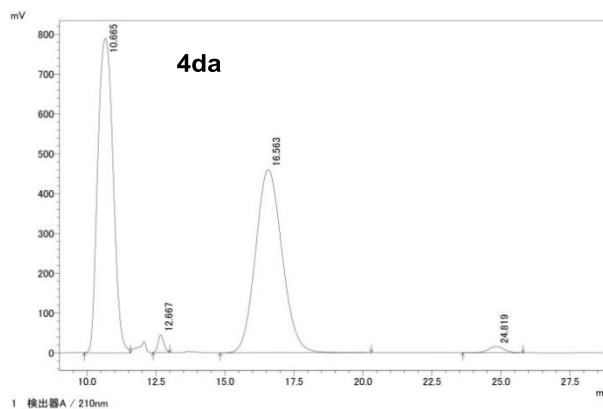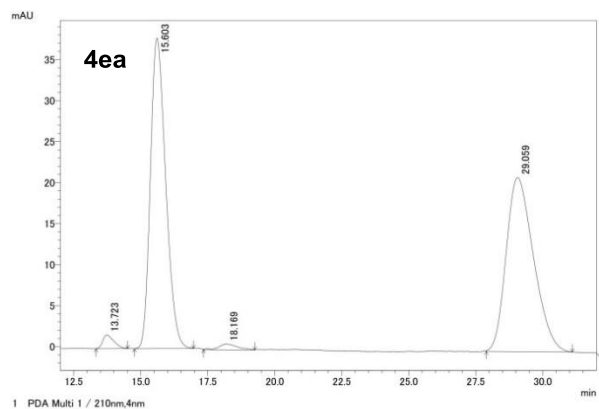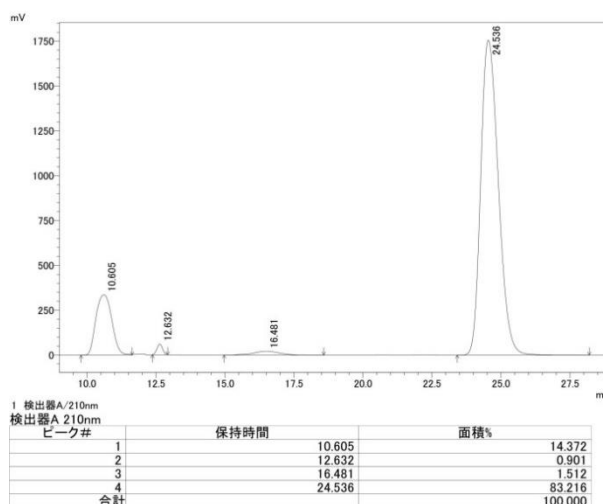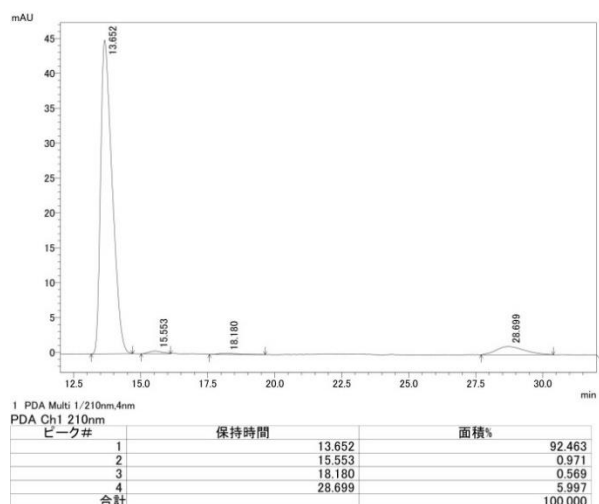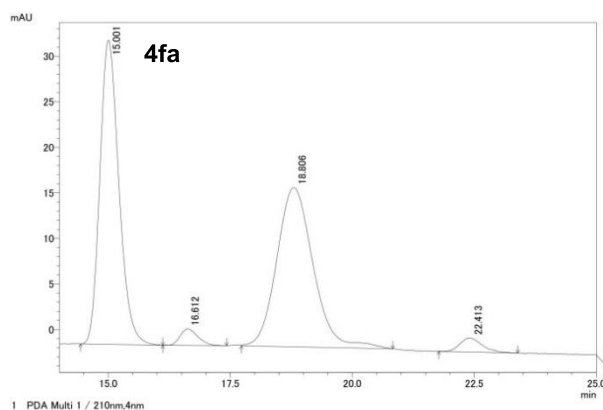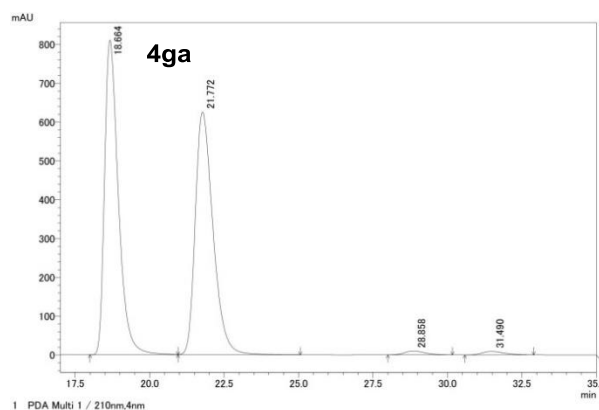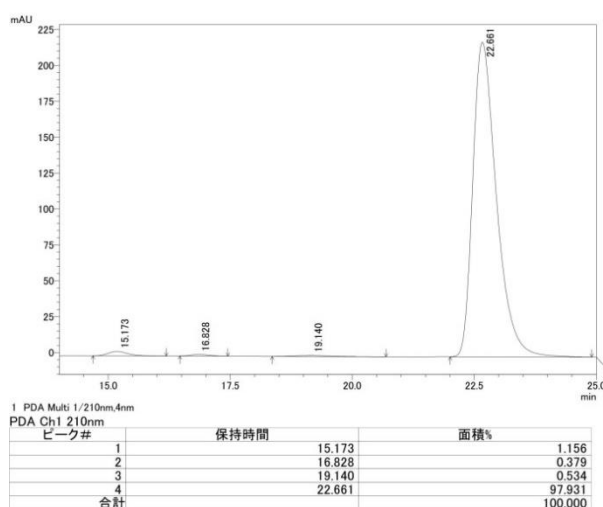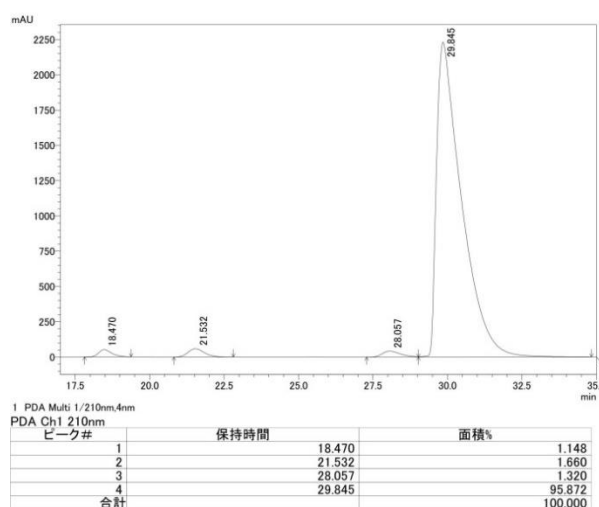

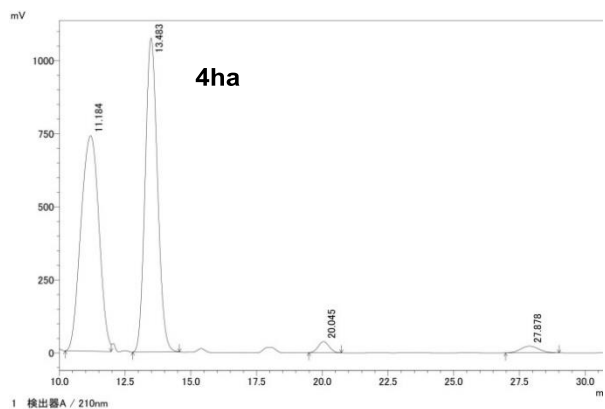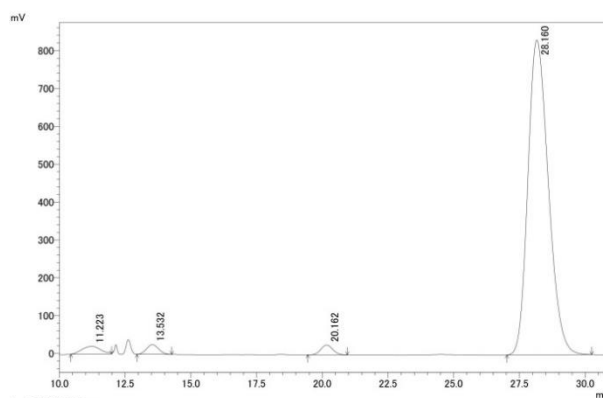

| ピーク# | 保持時間   | 面積%     |
|------|--------|---------|
| 1    | 11.223 | 2.153   |
| 2    | 13.532 | 1.726   |
| 3    | 20.162 | 1.709   |
| 4    | 28.160 | 94.412  |
| 合計   |        | 100.000 |
